# Supplementary material
Source: PubMed Central journal article supplement (PMC9898131)
Supplement: NIHMS1841020-supplement-1841020_Sup_Info.pdf [file NIHMS1841020-supplement-1841020_Sup_Info.pdf]

# Supporting Information

## Small Molecule Inhibition of the Archetypal UbiB protein COQ8

Nathan H. Murray<sup>1,2,3</sup>, Christopher R. M. Asquith<sup>4,5,6</sup>, Zixiang Fang<sup>3</sup>, Michael P. East<sup>4</sup>, Naomi Ptak<sup>1</sup>, Robert W. Smith<sup>1</sup>, James D. Vasta<sup>7</sup>, Chad A. Zimprich<sup>7</sup>, Cesear R. Corona<sup>7</sup>, Matthew B. Robers<sup>7</sup>, Gary L. Johnson<sup>4</sup>, Craig A. Bingman<sup>1</sup>, David J. Pagliarini<sup>1,2,3,8,9\*</sup>

<sup>1</sup>Department of Biochemistry, University of Wisconsin–Madison, Madison, WI 53706, USA.

<sup>2</sup>Morgridge Institute for Research, Madison, WI 53715, USA.

<sup>3</sup>Department of Cell Biology and Physiology, Washington University School of Medicine, St. Louis, MO 63110, USA.

<sup>4</sup>Department of Pharmacology, School of Medicine, University of North Carolina at Chapel Hill, Chapel Hill, NC 27599, USA.

<sup>5</sup>Structural Genomics Consortium and Division of Chemical Biology and Medicinal Chemistry, UNC Eshelman School of Pharmacy, University of North Carolina at Chapel Hill, Chapel Hill, NC 27599, USA

<sup>6</sup>School of Pharmacy, Faculty of Health Sciences, University of Eastern Finland, 70211 Kuopio, Finland.

<sup>7</sup>Promega Corporation, 2800 Woods Hollow Road, Madison, WI 53719, USA.

<sup>8</sup>Department of Biochemistry and Molecular Biophysics, Washington University School of Medicine, St. Louis, MO 63110, USA.

<sup>9</sup>Department of Genetics, Washington University School of Medicine, St. Louis, MO 63110, USA.

\*e-mail: pagliarini@wustl.edu

## **Contents**

Supplementary Tables 1-6

Supplementary Figures 1-4

Supplementary Note: TPP-UNC-CA157 Synthesis

Supplementary Tables

Supplementary Table 1. Inhibition data from Extended Data Figure 1a

| Compound  | IC <sub>50</sub> (μM) | 95% Confidence Interval (μM) |
|-----------|-----------------------|------------------------------|
| UNC-CA171 | 0.69                  | ± 0.11                       |
| UNC-CA75  | 0.71                  | ± 0.10                       |
| UNC-CA157 | 0.47                  | ± 0.076                      |
| UNC-CA80  | 0.49                  | ± 0.10                       |
| UNC-CA92  | 1.5                   | ± 0.21                       |
| UNC-CA327 | 1.1                   | ± 0.23                       |
| UNC-CA169 | 1.2                   | ± 0.17                       |
| UNC-CA62  | 1.7                   | ± 0.38                       |

Supplementary Table 2. DSF binding data from Extended Data Figure 1b

| Compound  | K <sub>d,app</sub> (μM) | 95% Confidence Interval (μM) |
|-----------|-------------------------|------------------------------|
| UNC-CA171 | 26                      | ± 9.1                        |
| UNC-CA75  | 15                      | ± 2.7                        |
| UNC-CA157 | 23                      | ± 9.2                        |
| UNC-CA80  | 7.6                     | ± 4.3                        |
| UNC-CA92  | 21                      | ± 6.5                        |
| UNC-CA327 | 27                      | ± 6.6                        |
| UNC-CA169 | 20                      | ± 7.5                        |
| UNC-CA62  | 26                      | ± 9.9                        |

Supplementary Table 3. NanoBRET apparent live cell affinity data from Figure 1e

| Compound  | COQ8A<br>IC <sub>50</sub> (nM) | COQ8B<br>IC <sub>50</sub> (nM) |
|-----------|--------------------------------|--------------------------------|
| PD173955  | 1080 ± 70                      | 270 ± 30                       |
| UNC-CA157 | 580 ± 40                       | > 10,000                       |
| UNC-CA171 | 730 ± 40                       | > 10,000                       |
| UNC-CA75  | 1410 ± 90                      | > 10,000                       |
| UNC-CA81  | 7000 ± 3000                    | > 10,000                       |
| UNC-CA162 | 3600 ± 500                     | > 10,000                       |

Supplementary Table 4. NanoBRET apparent live cell affinity data from Figure 4b

| Target | UNC-CA157<br>IC <sub>50</sub> (nM) | TPP-UNC-CA157<br>IC <sub>50</sub> (nM) |
|--------|------------------------------------|----------------------------------------|
| COQ8A  | 640 ± 80                           | >2,000                                 |
| COQ8B  | >10,000                            | > 10,000                               |
| ACVR1  | >2,000                             | > 10,000                               |
| GAK    | 150 ± 20                           | > 2,000                                |
| NLK    | 42 ± 2                             | > 2,000                                |
| PKN3   | >2,000                             | > 10,000                               |
| RIPK2  | 58 ± 5                             | > 10,000                               |

Supplementary Table 5. Oligonucleotides used in this study for site directed mutagenesis

| Primer Name   | Primer Sequence                    |
|---------------|------------------------------------|
| COQ8A_F336A_F | GAGGAGCGGCCCGCCGCCGCCGCATCCATTG    |
| COQ8A_F336A_R | GATGCGGCGGCCGCGGGCCGCTCCTCGAAGTA   |
| COQ8A_A356G_F | GGCCGCGAGGTGGGCATGAAGATCCAGTAC     |
| COQ8A_A356G_R | CTGGATCTTCATGCCACCTCGCGGCC         |
| COQ8A_K358A_F | GAGGTGGCCATGGCGATCCAGTACCCTGGCGTG  |
| COQ8A_K358A_R | AGGGTACTGGATCGCCATGGCCACCTC        |
| COQ8A_K358E_F | GAGGTGGCCATGGAGATCCAGTACCCTGGC     |
| COQ8A_K358E_R | AGGGTACTGGATCTCCATGGCCACCTCGCG     |
| COQ8A_L443A_F | AGCCACATGTGGCGACCACAGAGCTG         |
| COQ8A_L443A_R | CAGCTCTGTGGTCGCCACATGTGGGCT        |
| COQ8A_T445A_F | CATGTGCTGACCGCAGAGCTGGTGTCTGGCTTC  |
| COQ8A_T445A_R | AGACACCAGCTCTGCGGTCAGCACATGTGG     |
| COQ8A_L447A_F | CTGACCACAGAGGCGGTGTCTGGCTTCCCC     |
| COQ8A_L447A_R | GAAGCCAGACACCGCCTCTGTGGTCAGCACATG  |
| COQ8A_V448P_F | ACCACAGAGCTGCCGTCTGGCTTCCCC        |
| COQ8A_V448P_R | GGGGAAGCCAGACGGCAGCTCTGTGGTCAG     |
| COQ8A_F495A_F | TGGTCCAACCTCGCCTATGACCCCCAGCAGCAC  |
| COQ8A_F495A_R | CTGGGGGTCATAGGCCGAAGTTGGACCAGTTGGG |

|               |                                    |
|---------------|------------------------------------|
| COQ8A_F495L_F | TGGTCCAACCTTCctgTATGACCCCCAGCAGCAC |
| COQ8A_F495L_R | CCCAACTGGTCCAACCTTCctgTATGACCCCCAG |
| Coq8p_L353F_F | TGGGCAAATTTTctcTATAACGGTAGGACAAAG  |
| Coq8p_L353F_R | CCTACCGTTATAgaaGAAATTTGCCCAATTAGG  |

Supplementary Table 6. Crystallography data collection and refinement statistics

|                                     | 7UDP                           | 7UDQ                           |
|-------------------------------------|--------------------------------|--------------------------------|
| <b>Data collection</b>              |                                |                                |
| Space group                         | C2                             | P1                             |
| Cell dimensions                     |                                |                                |
| $a, b, c$ (Å)                       | 151.21, 56.38, 48.68           | 48.27, 54.86, 80.01            |
| $\alpha, \beta, \gamma$ (°)         | 90, 98.39, 90                  | 109.79, 94.62, 92.11           |
| Resolution (Å)                      | 37.4 – 2.01<br>(2.082 – 2.01)* | 38.72 – 1.90<br>(1.97 – 1.90)* |
| $R_{\text{merge}}$                  | 0.0337 (1.45)                  | 0.0632 (1.10)                  |
| $I / \sigma I$                      | 21.35 (1.01)                   | 9.38 (1.01)                    |
| Completeness (%)                    | 99.86 (99.93)                  | 96.99 (96.29)                  |
| Redundancy                          | 6.7 (6.8)                      | 3.6 (3.7)                      |
| <b>Refinement</b>                   |                                |                                |
| Resolution (Å)                      | 37.40 – 2.01                   | 38.72 – 1.90                   |
| No. reflections                     | 27131                          | 58805                          |
| $R_{\text{work}} / R_{\text{free}}$ | 0.239 / 0.279                  | 0.199 / 0.238                  |
| No. atoms                           | 3096                           | 6354                           |
| Protein                             | 3053                           | 6036                           |
| Ligand/ion                          | 42                             | 86                             |
| Water                               | 18                             | 266                            |
| $B$ -factors                        | 88.0                           | 55.6                           |
| Protein                             | 88.3                           | 56.0                           |
| Ligand/ion                          | 65.7                           | 41.0                           |
| Water                               | 65.2                           | 50.9                           |
| R.m.s. deviations                   |                                |                                |
| Bond lengths (Å)                    | 0.002                          | 0.006                          |
| Bond angles (°)                     | 0.46                           | 0.64                           |

\*Values in parentheses are for highest-resolution shell.

Ramachandran statistics for

7UDP: 94.3% favored, 5.7% allowed, 0% outliers

7UDQ: 98.0% favored, 1.9% allowed, 0.14% outliers

7UDP & 7UDQ data collection wavelength 1.033Å, data collection temperature 100K

## Supplementary Figures

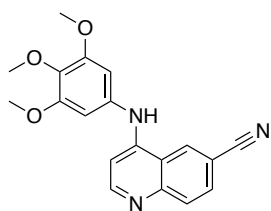

UNC-CA171

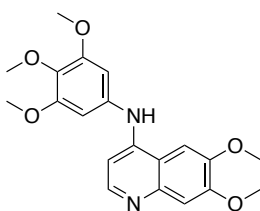

UNC-CA75

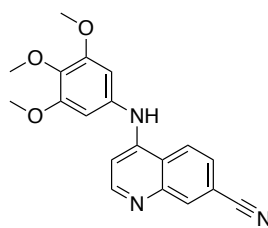

UNC-CA157

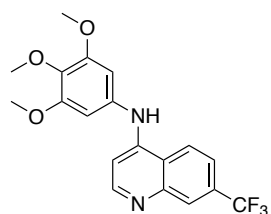

UNC-CA80

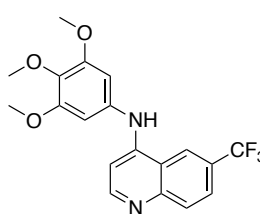

UNC-CA62

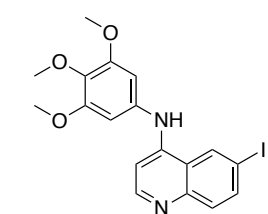

UNC-CA92

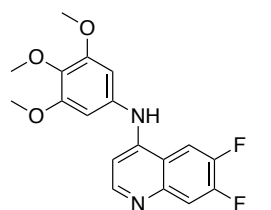

UNC-CA327

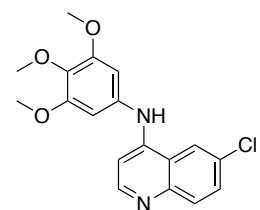

UNC-CA169

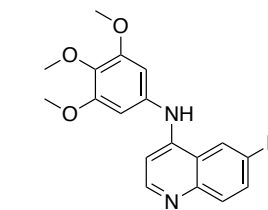

UNC-CA93

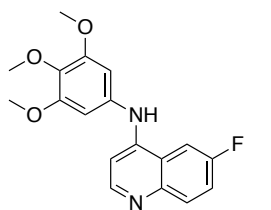

UNC-CA82

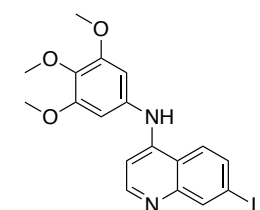

UNC-CA94

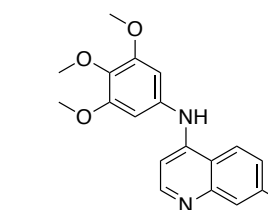

UNC-CA173

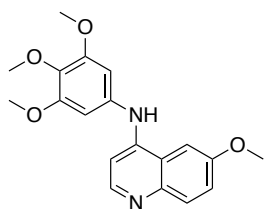

UNC-CA81

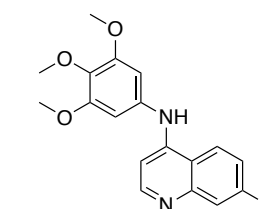

UNC-CA93.5

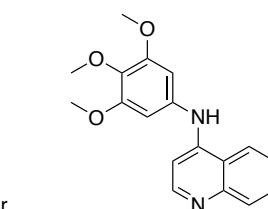

UNC-CA162

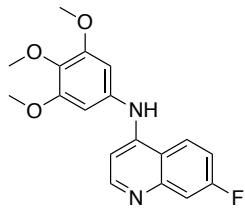

UNC-CA163

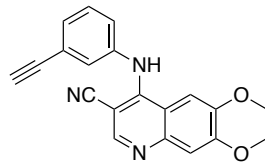

UNC-CA252

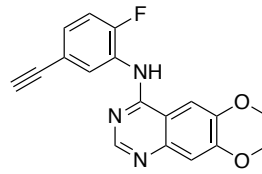

UNC-CA360

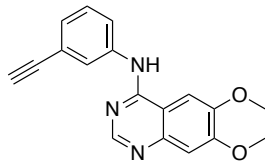

UNC-CA176

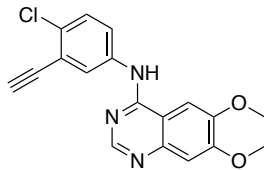

UNC-CA359

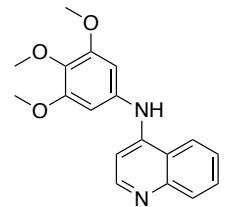

UNC-CA73

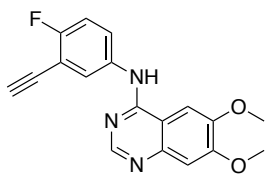

UNC-CA358

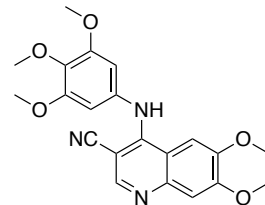

UNC-CA249

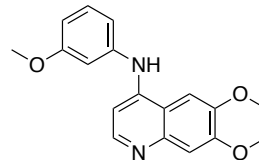

UNC-CA128

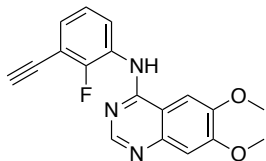

UNC-CA384

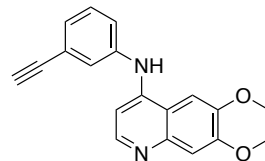

UNC-CA156

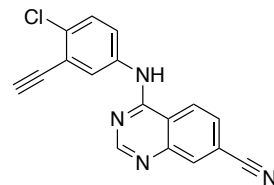

UNC-CA331

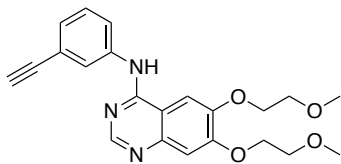

Erlotinib

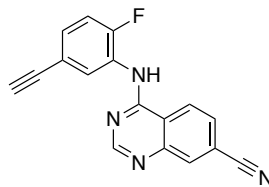

UNC-CA332

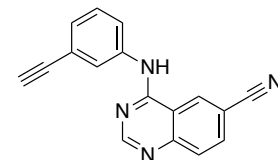

UNC-CA207

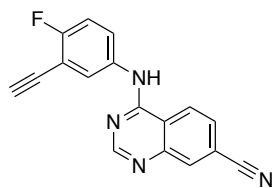

UNC-CA330

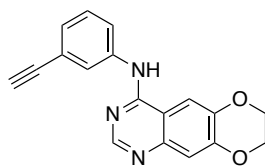

UNC-CA309

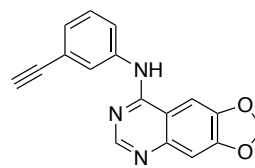

UNC-CA310

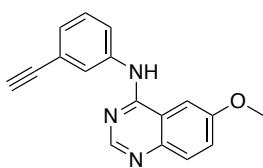

UNC-CA209

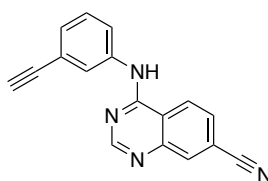

UNC-CA271

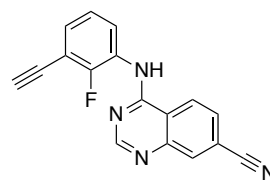

UNC-CA386

**Supplementary Fig. 1 | Chemical structures of the compounds used in Fig. 1a**



**a**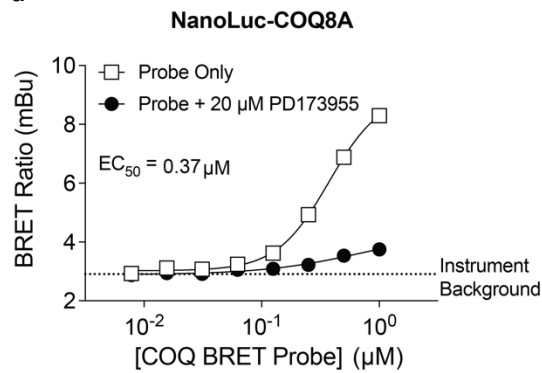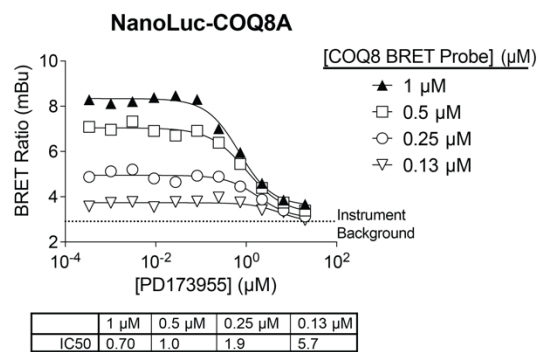**b**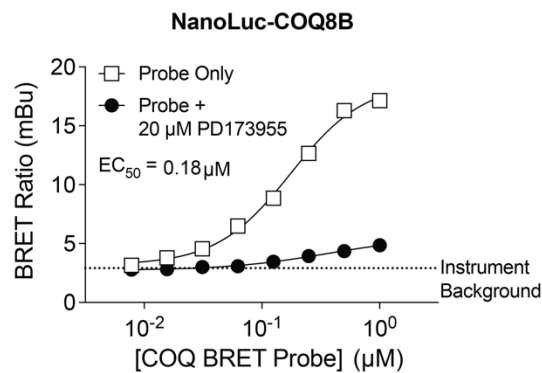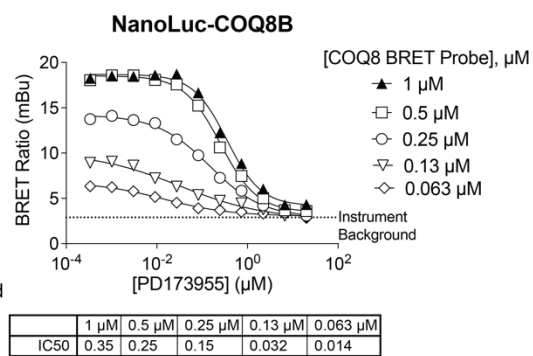

**Supplementary Fig. 2 | Validation of the BRET probe for COQ8A and COQ8B in HEK293 cells.** Characterization of BRET between (A) NanoLuc-COQ8A and (B) NanoLuc-COQ8B and the COQ8 BRET probe. Probe titrations (left) produced specific BRET as demonstrated via competition with 20 μM PD173955. Individual data points are the mean of technical duplicates (n=1). PD173955 competed the BRET signal in a dose-responsive manner (right). Individual data points are technical singlicates (n=1). The probe concentrations used for subsequent affinity measurements for test compounds are highlighted with black triangles (right).

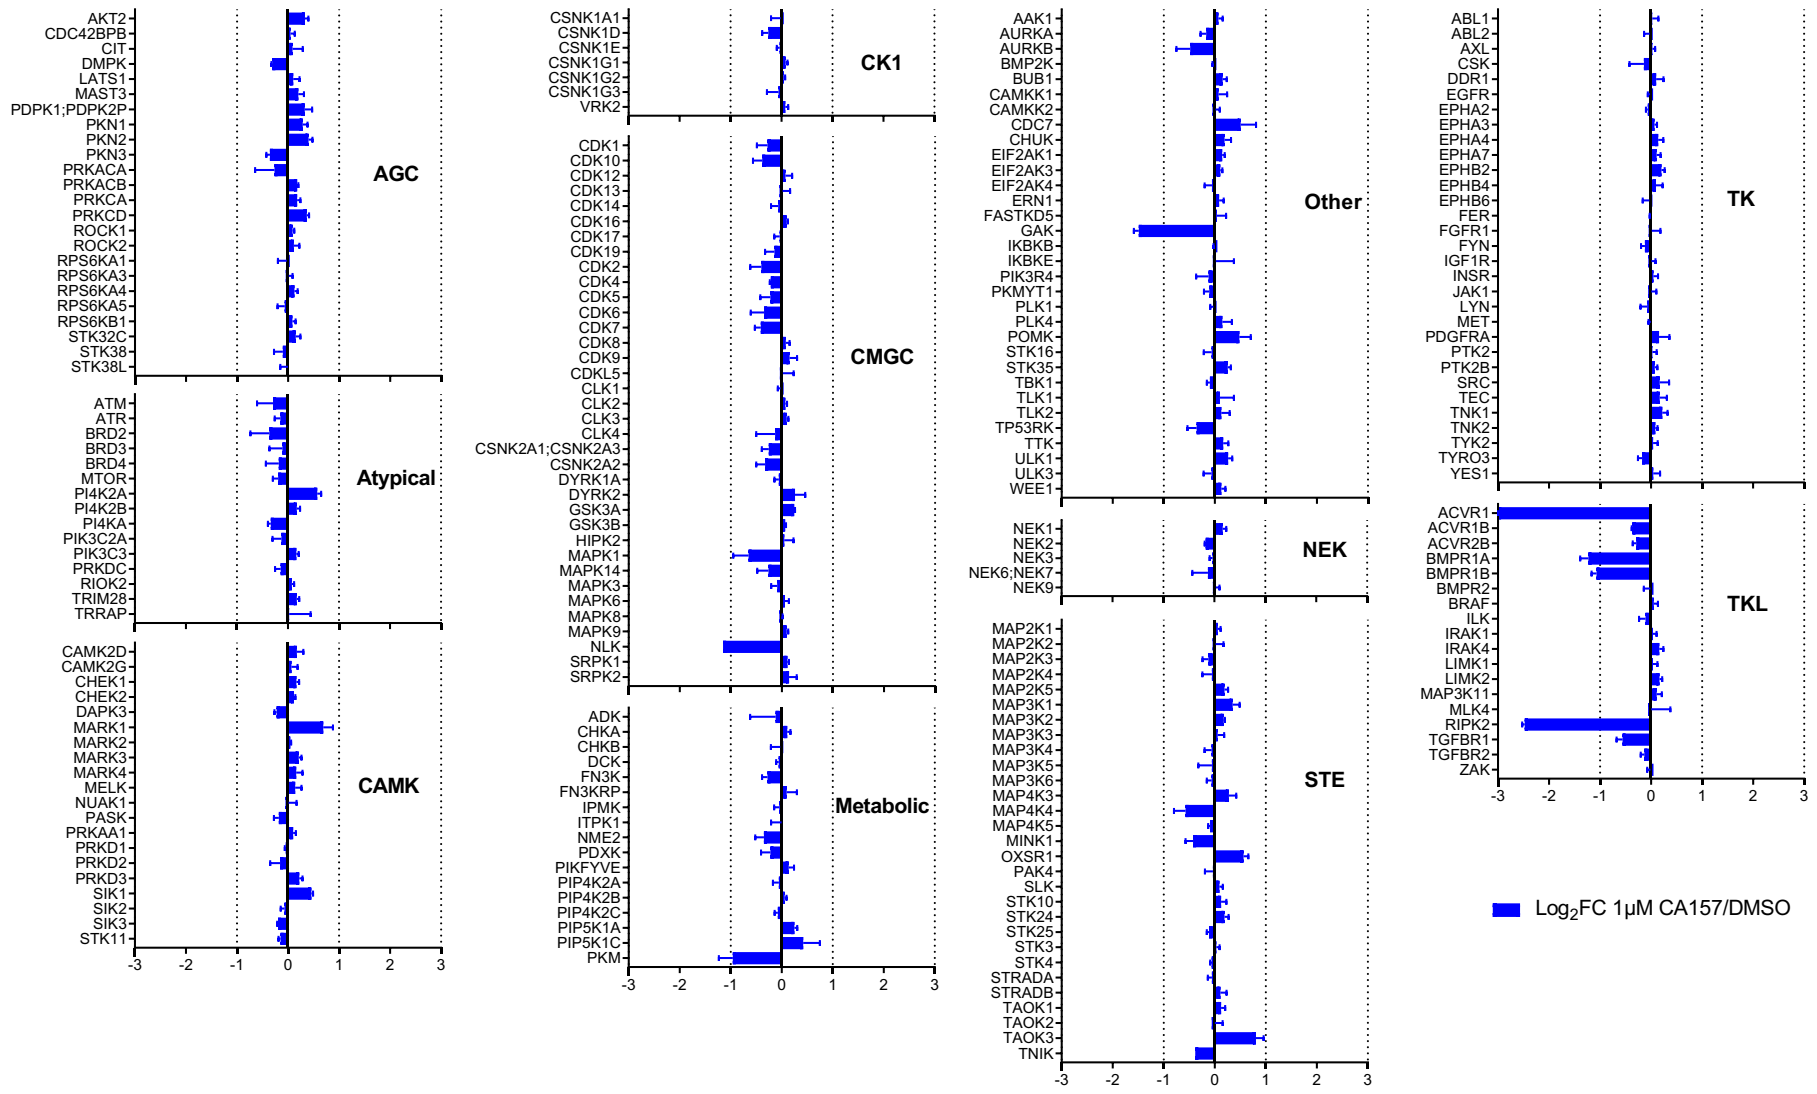

Supplementary Fig. 3 | Full MIBS-MS Profile for UNC-CA157

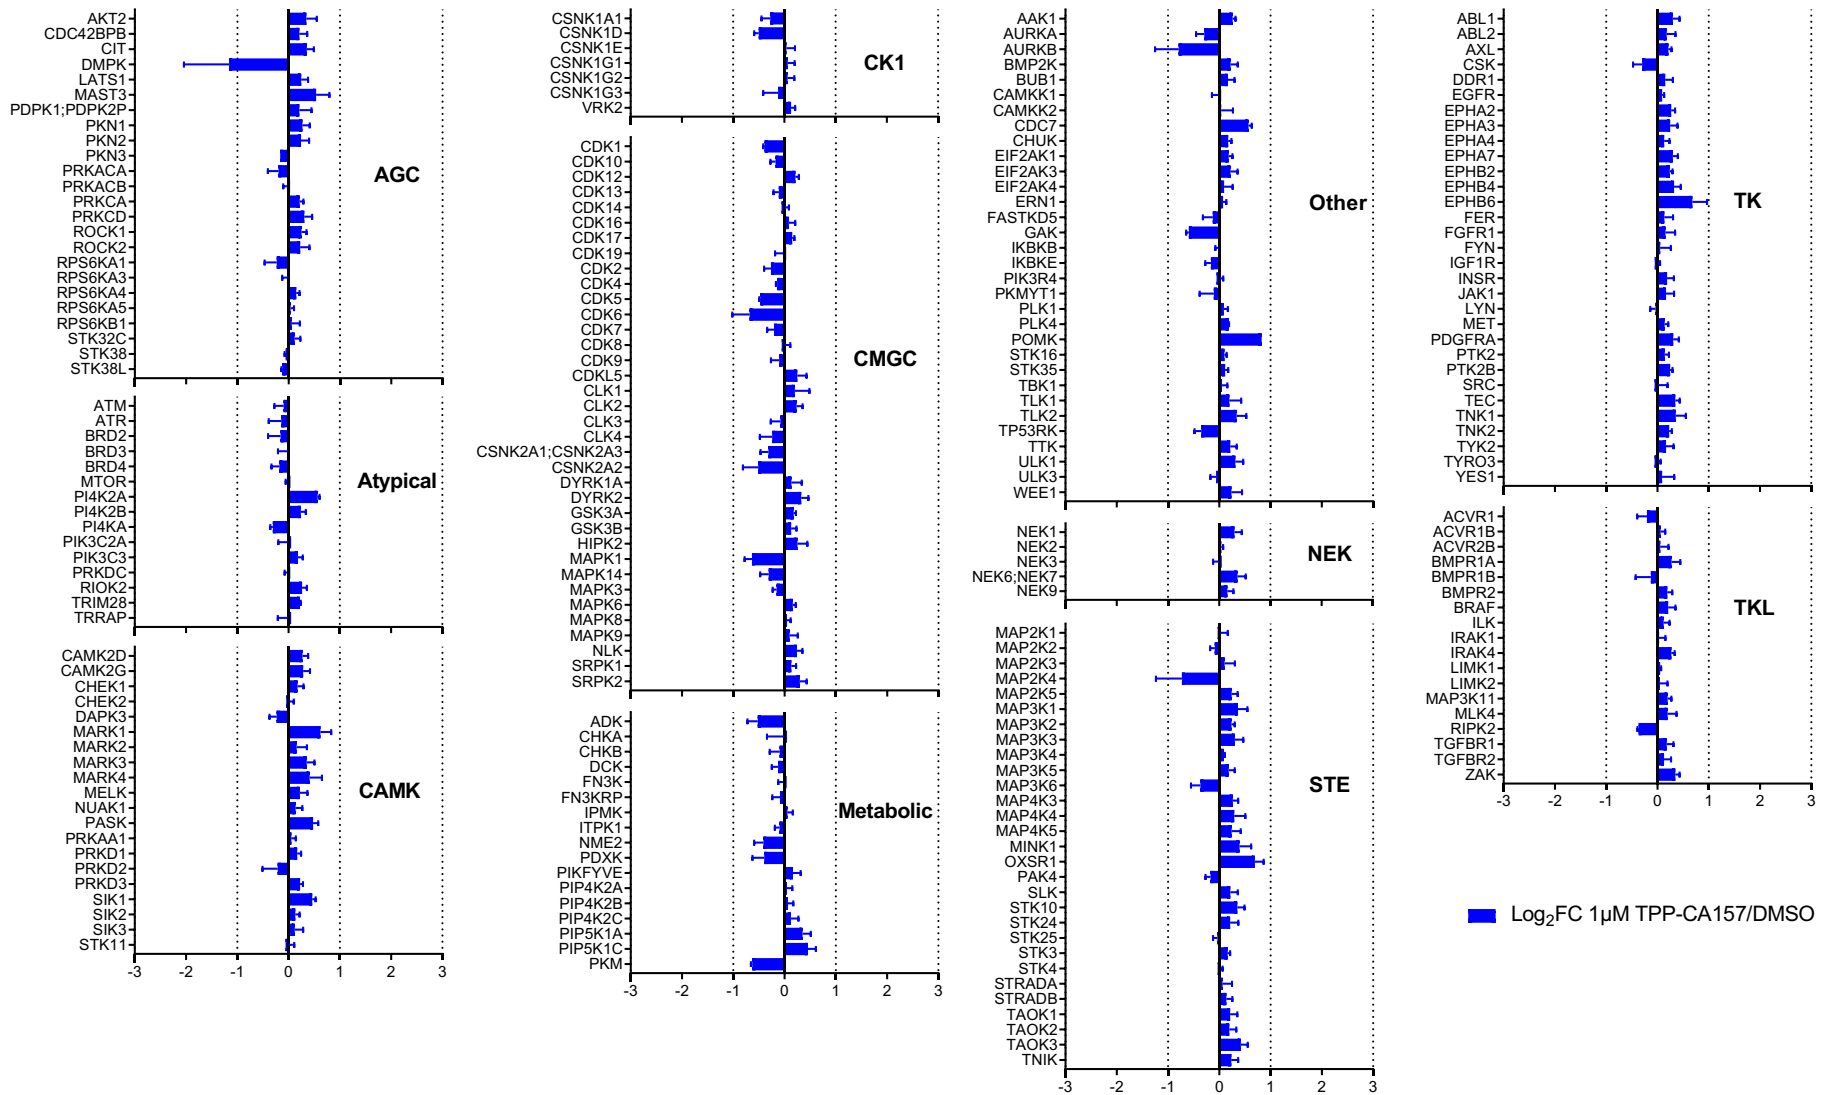

Supplementary Fig. 4 | Full MIBS-MS Profile for TPP-UNC-CA157

## Supplementary Note: TPP-UNC-CA157 Synthesis

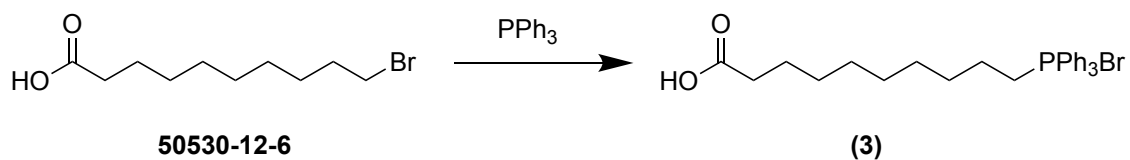

A mixture of 10-bromodecanoic acid (500 mg, 1.99 mmol, 1.00 eq) and PPh<sub>3</sub> (522 mg, 1.99 mmol, 1.00 eq) in MeCN (5.00 mL) was stirred at 90 °C for 70 h. LC-MS (EB3453-2-P1L5) showed the desired MS peak was detected. The mixture was concentrated to give crude compound (3) (1.10 g, 73.2% yield) as a light pink oil and used directly for the next step without further purification (LC-MS EB3453-2-P1A1).

# LCMS REPORT

Print time : 12/15/2020 13:04:17  
Compound ID : 1  
Sample ID : EB3453-2-P1L5  
Injection Date : 12/15/2020 1:02:32 PM  
Injection Vol : 3ul  
Location : tray1 vail23  
Acq Method : 5-95AB 1.5min 220&254 Shimadzu All.lcm  
Org DataFile : D:\DATA\2020\2012\201215\EB3453-2-P1L5.lcd  
Instrument & column: LCMS-SAW 1-2402  
Chromolith Flash RP-18, 5um,3.0\*25mm

Chromatogram

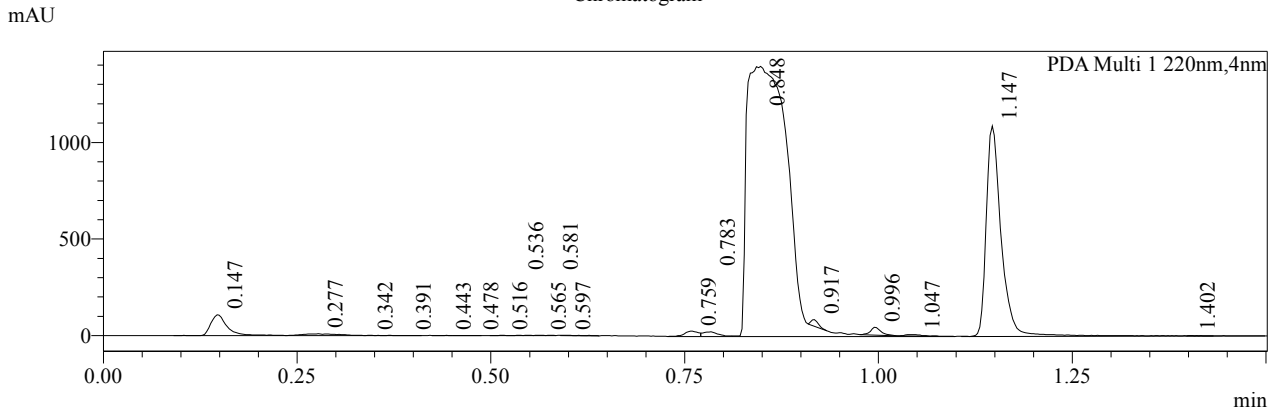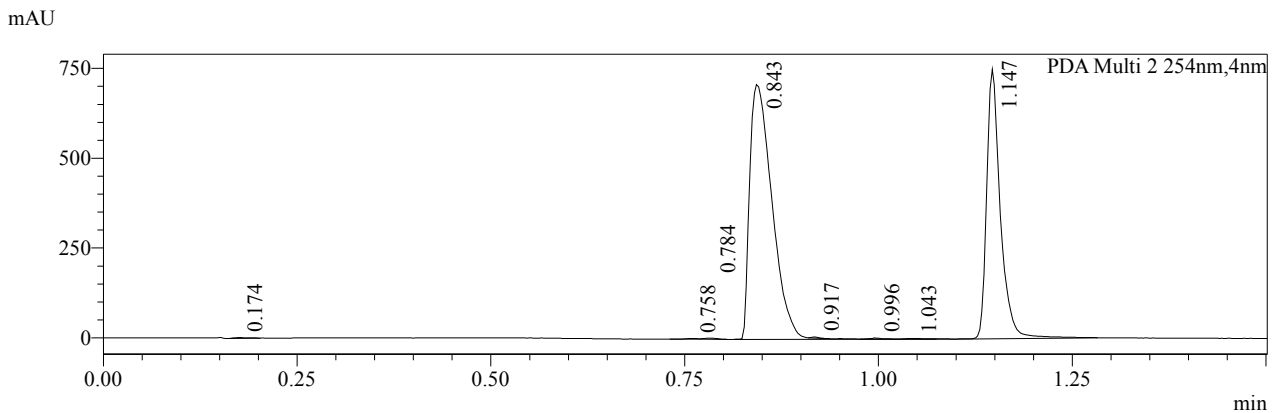

- 1 PDA Multi 1 / 220nm,4nm
- 2 PDA Multi 2 / 254nm,4nm

MS Chromatogram

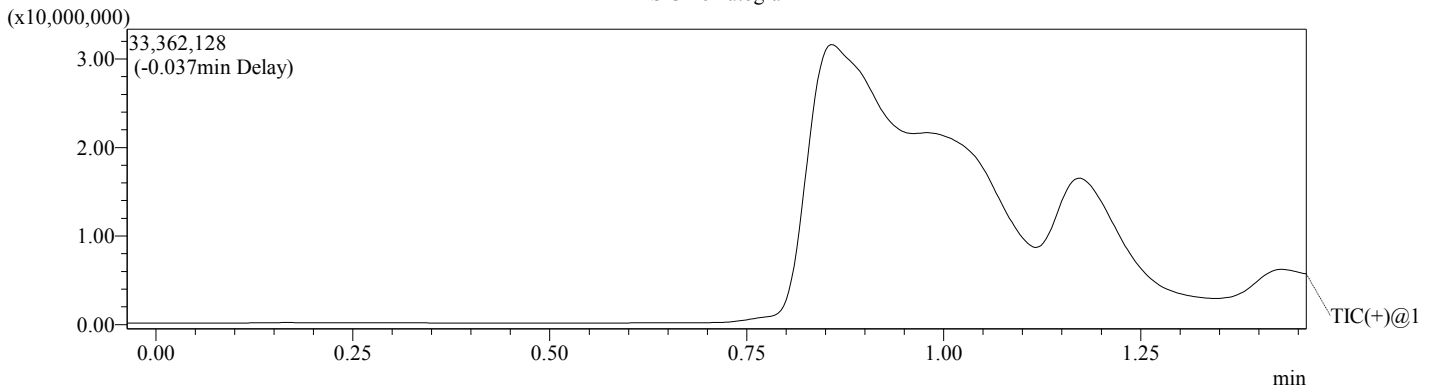

Integration Result

## PDA Ch1 220nm

| Peak# | Ret. Time | Height  | Height% | USP Width | Area    | Area%  |
|-------|-----------|---------|---------|-----------|---------|--------|
| 1     | 0.147     | 108235  | 3.930   | 0.041     | 161442  | 2.336  |
| 2     | 0.277     | 9497    | 0.345   | 0.096     | 32294   | 0.467  |
| 3     | 0.342     | 2081    | 0.076   | 0.028     | 2786    | 0.040  |
| 4     | 0.391     | 1079    | 0.039   | 0.018     | 1445    | 0.021  |
| 5     | 0.443     | 1562    | 0.057   | 0.014     | 1111    | 0.016  |
| 6     | 0.478     | 1243    | 0.045   | 0.051     | 1837    | 0.027  |
| 7     | 0.516     | 1188    | 0.043   | 0.029     | 1051    | 0.015  |
| 8     | 0.536     | 1965    | 0.071   | 0.017     | 1240    | 0.018  |
| 9     | 0.565     | 2420    | 0.088   | 0.045     | 3040    | 0.044  |
| 10    | 0.581     | 1973    | 0.072   | 0.045     | 1023    | 0.015  |
| 11    | 0.597     | 2386    | 0.087   | 0.057     | 4086    | 0.059  |
| 12    | 0.759     | 27068   | 0.983   | 0.050     | 34544   | 0.500  |
| 13    | 0.783     | 23292   | 0.846   | 0.069     | 30304   | 0.439  |
| 14    | 0.848     | 1397055 | 50.728  | 0.081     | 5079105 | 73.507 |
| 15    | 0.917     | 34694   | 1.260   | 0.019     | 19673   | 0.285  |
| 16    | 0.996     | 39633   | 1.439   | 0.028     | 37682   | 0.545  |
| 17    | 1.047     | 7550    | 0.274   | 0.038     | 11078   | 0.160  |
| 18    | 1.147     | 1089692 | 39.568  | 0.038     | 1484392 | 21.483 |
| 19    | 1.402     | 1377    | 0.050   | 0.051     | 1555    | 0.023  |

## PDA Ch2 254nm

| Peak# | Ret. Time | Height | Height% | USP Width | Area    | Area%  |
|-------|-----------|--------|---------|-----------|---------|--------|
| 1     | 0.174     | 2401   | 0.163   | 0.036     | 2829    | 0.120  |
| 2     | 0.758     | 2472   | 0.168   | 0.491     | 2958    | 0.125  |
| 3     | 0.784     | 3245   | 0.220   | 0.044     | 3940    | 0.167  |
| 4     | 0.843     | 708910 | 48.085  | 0.057     | 1420317 | 60.142 |
| 5     | 0.917     | 2604   | 0.177   | 0.021     | 1406    | 0.060  |
| 6     | 0.996     | 3171   | 0.215   | 0.026     | 2983    | 0.126  |
| 7     | 1.043     | 1913   | 0.130   | 0.042     | 3037    | 0.129  |
| 8     | 1.147     | 749566 | 50.843  | 0.035     | 924120  | 39.131 |

Operator: \_\_\_\_\_

Date: \_\_\_\_\_

Mass Spectrum

RefTime: 0.147 Datafile: D:\DATA\2020\2012\201215\EB3453-2-P1L5.lcd

Intensity

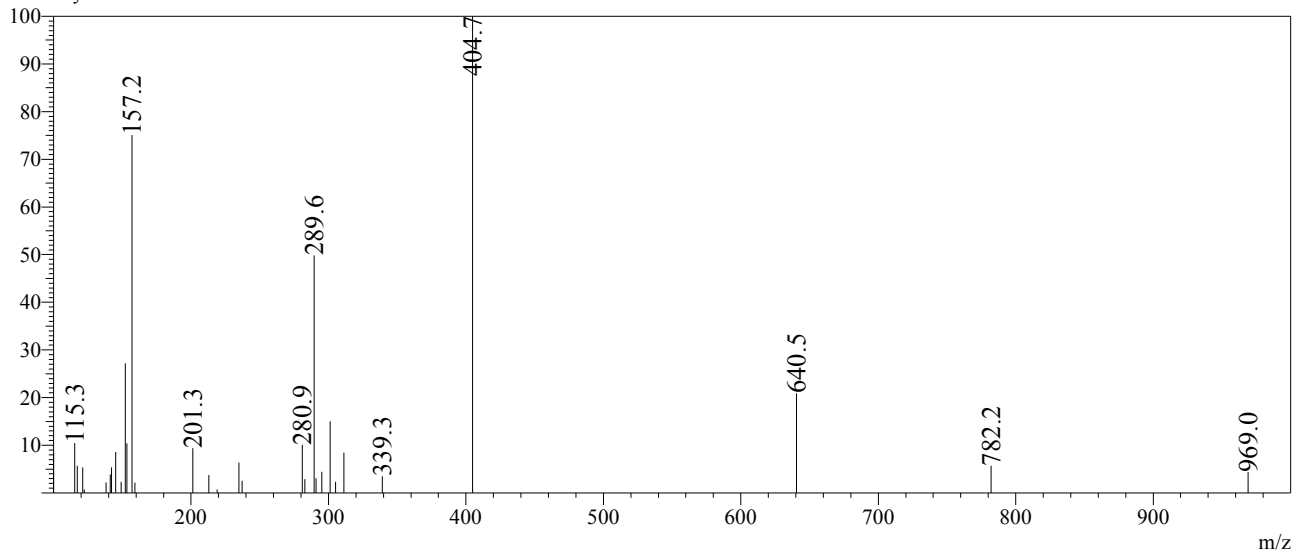

RefTime: 0.847 Datafile: D:\DATA\2020\2012\201215\EB3453-2-P1L5.lcd

Intensity

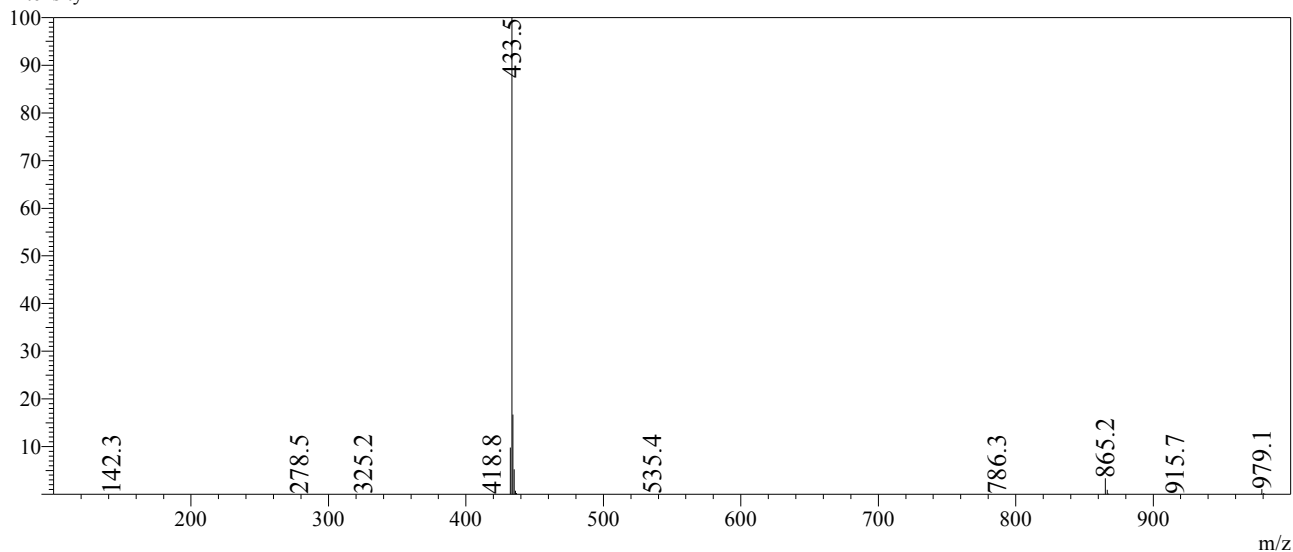

RefTime: 1.147 Datafile: D:\DATA\2020\2012\201215\EB3453-2-P1L5.lcd

Intensity

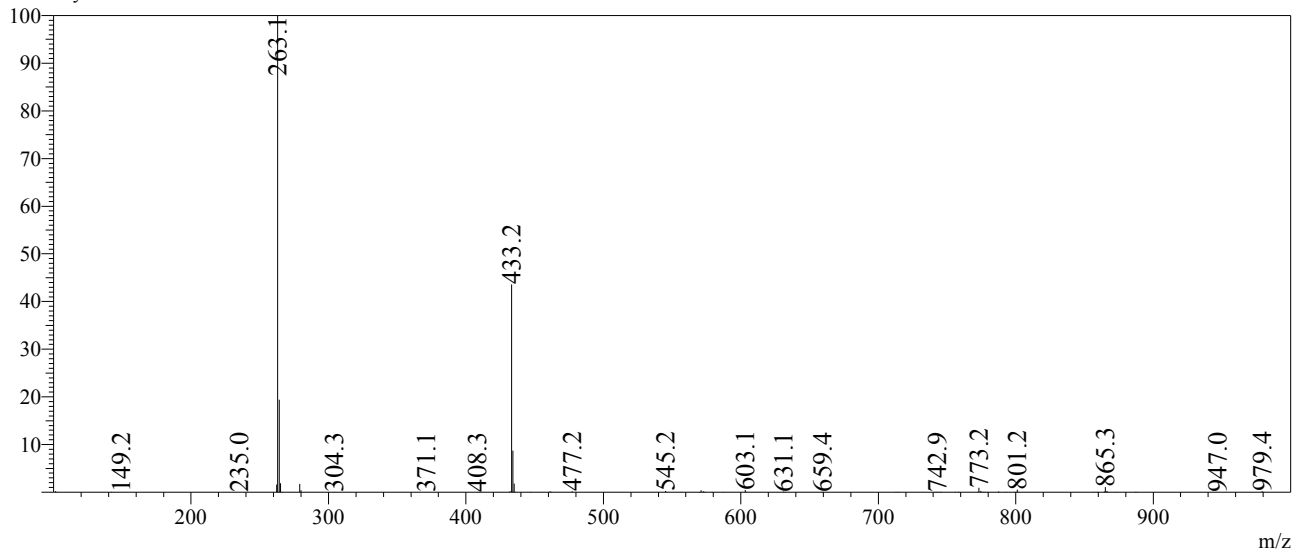

# LCMS REPORT

Print time : 12/16/2020 15:02:03  
Compound ID : 1  
Sample ID : EB3453-2-P1A1  
Injection Date : 12/16/2020 3:00:20 PM  
Injection Vol : 2ul  
Location : tray1 vail52  
Acq Method : 5-95AB 1.5min 220&254 Shimadzu All.lcm  
Org DataFile : D:\DATA\2020\2012\201216\EB3453-2-P1A1.lcd  
Instrument & column: LCMS-SAW 1-2402  
Chromolith Flash RP-18, 5um,3.0\*25mm

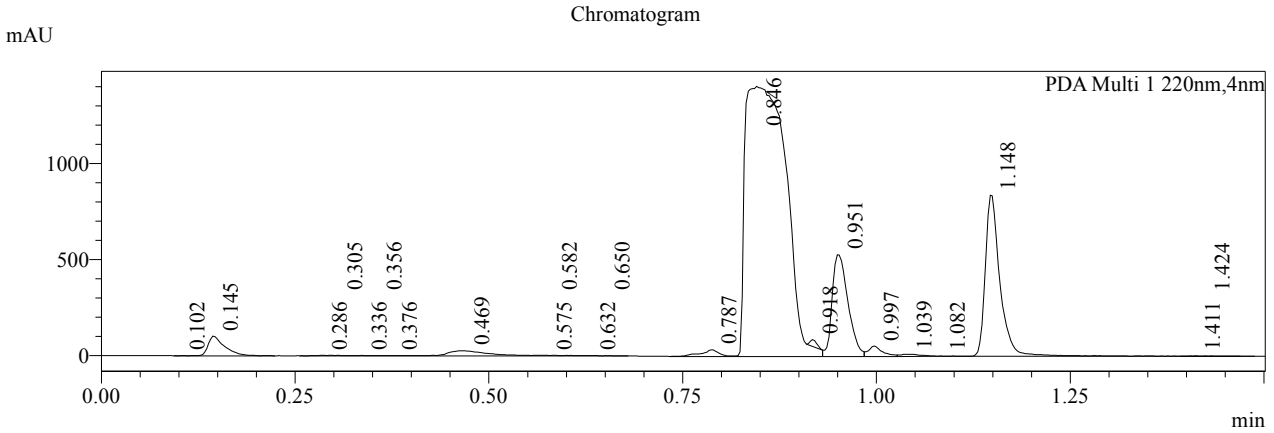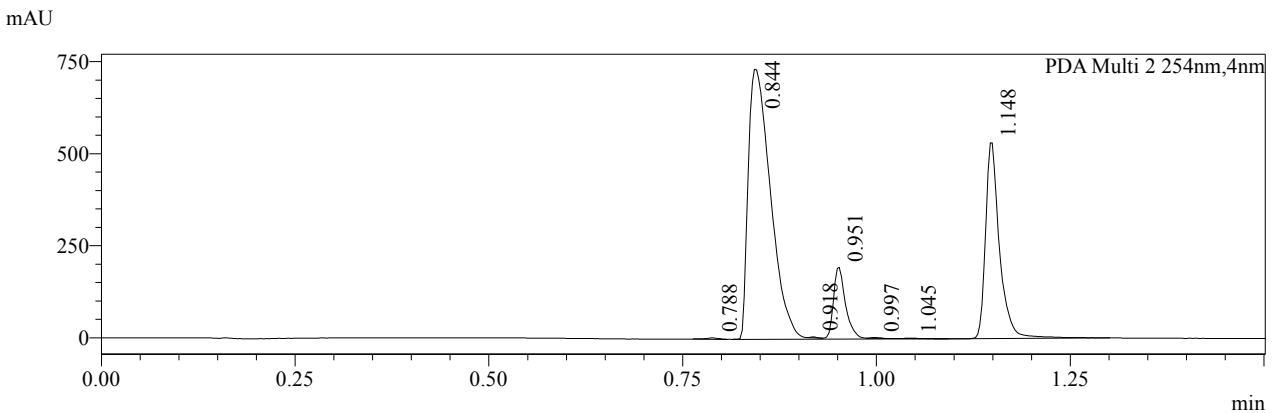

- 1 PDA Multi 1 / 220nm,4nm
- 2 PDA Multi 2 / 254nm,4nm

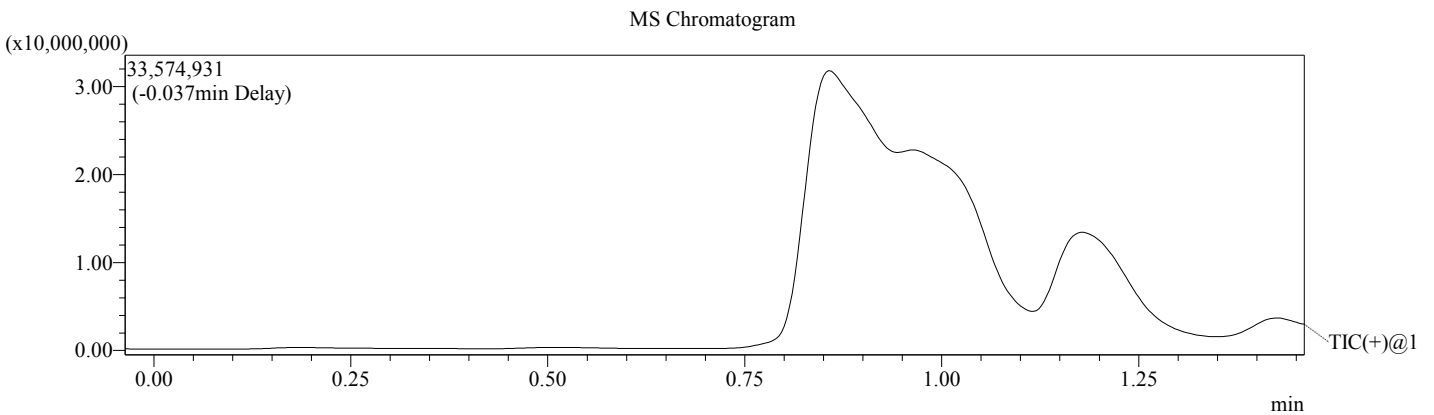

Integration Result



## PDA Ch1 220nm

| Peak# | Ret. Time | Height  | Height% | USP Width | Area    | Area%  |
|-------|-----------|---------|---------|-----------|---------|--------|
| 1     | 0.102     | 1705    | 0.055   | 0.009     | 1064    | 0.014  |
| 2     | 0.145     | 102222  | 3.327   | 0.042     | 150981  | 2.024  |
| 3     | 0.286     | 2815    | 0.092   | 0.057     | 3503    | 0.047  |
| 4     | 0.305     | 3463    | 0.113   | 0.065     | 5676    | 0.076  |
| 5     | 0.336     | 2992    | 0.097   | 0.061     | 2324    | 0.031  |
| 6     | 0.356     | 2153    | 0.070   | 0.018     | 1199    | 0.016  |
| 7     | 0.376     | 2235    | 0.073   | 0.050     | 3169    | 0.042  |
| 8     | 0.469     | 27121   | 0.883   | 0.094     | 101118  | 1.355  |
| 9     | 0.575     | 4194    | 0.137   | 0.066     | 5021    | 0.067  |
| 10    | 0.582     | 3680    | 0.120   | 0.106     | 8221    | 0.110  |
| 11    | 0.632     | 2437    | 0.079   | 0.051     | 2282    | 0.031  |
| 12    | 0.650     | 1733    | 0.056   | 0.133     | 1766    | 0.024  |
| 13    | 0.787     | 35117   | 1.143   | 0.038     | 56653   | 0.759  |
| 14    | 0.846     | 1404560 | 45.718  | 0.081     | 5128500 | 68.740 |
| 15    | 0.918     | 36998   | 1.204   | 0.019     | 19504   | 0.261  |
| 16    | 0.951     | 529232  | 17.226  | 0.041     | 755442  | 10.126 |
| 17    | 0.997     | 54070   | 1.760   | 0.037     | 66817   | 0.896  |
| 18    | 1.039     | 11525   | 0.375   | 0.059     | 21083   | 0.283  |
| 19    | 1.082     | 1746    | 0.057   | 0.040     | 2082    | 0.028  |
| 20    | 1.148     | 839200  | 27.316  | 0.037     | 1120789 | 15.022 |
| 21    | 1.411     | 1491    | 0.049   | 0.038     | 1471    | 0.020  |
| 22    | 1.424     | 1545    | 0.050   | 0.046     | 2088    | 0.028  |

## PDA Ch2 254nm

| Peak# | Ret. Time | Height | Height% | USP Width | Area    | Area%  |
|-------|-----------|--------|---------|-----------|---------|--------|
| 1     | 0.788     | 3905   | 0.266   | 0.037     | 5029    | 0.212  |
| 2     | 0.844     | 733198 | 49.868  | 0.057     | 1469731 | 61.975 |
| 3     | 0.918     | 2693   | 0.183   | 0.017     | 1369    | 0.058  |
| 4     | 0.951     | 194557 | 13.233  | 0.032     | 217540  | 9.173  |
| 5     | 0.997     | 2455   | 0.167   | 0.023     | 1908    | 0.080  |
| 6     | 1.045     | 1401   | 0.095   | 0.035     | 1916    | 0.081  |
| 7     | 1.148     | 532055 | 36.188  | 0.035     | 673986  | 28.420 |

Operator: \_\_\_\_\_

Date: \_\_\_\_\_

Mass Spectrum

RefTime: 0.143 Datafile: D:\DATA\2020\2012\201216\EB3453-2-P1A1.lcd

Intensity

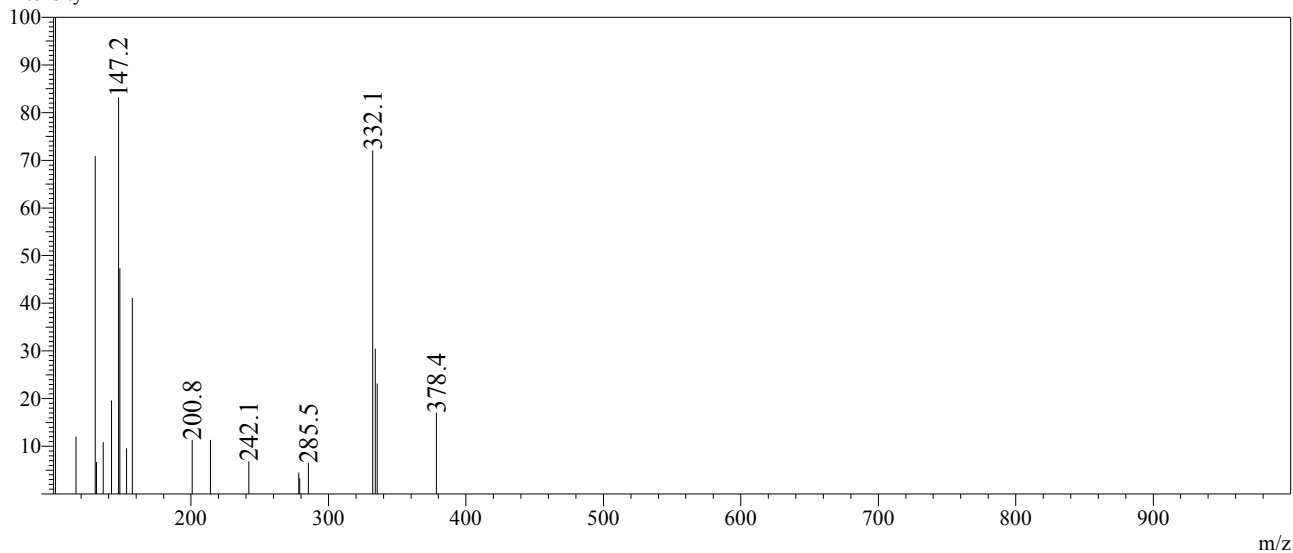

RefTime: 0.847 Datafile: D:\DATA\2020\2012\201216\EB3453-2-P1A1.lcd

Intensity

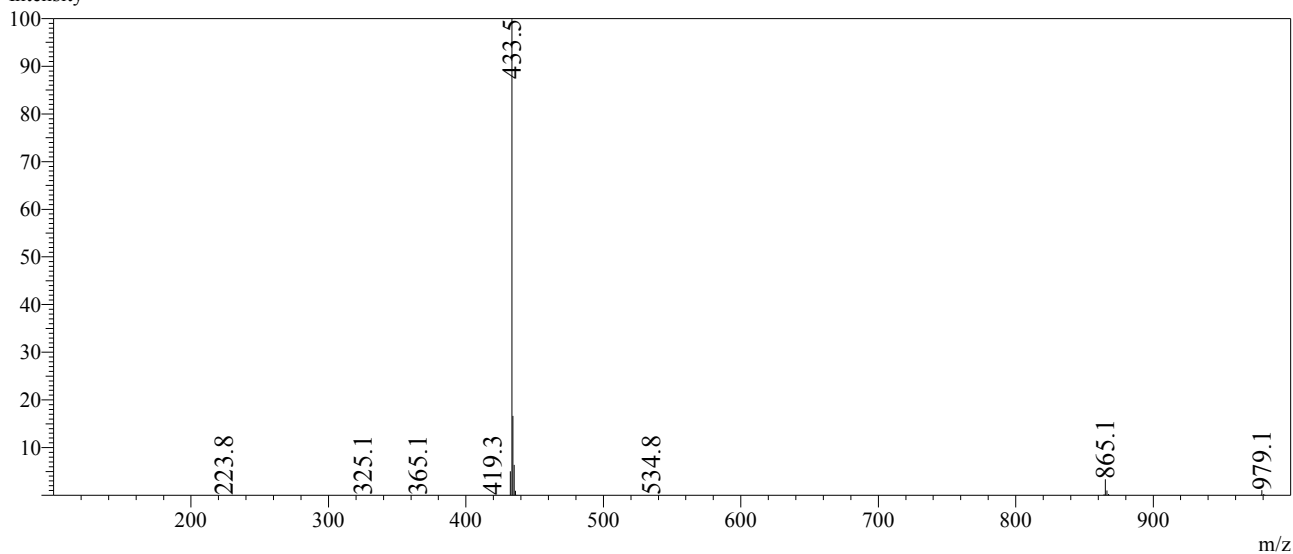

RefTime: 0.950 Datafile: D:\DATA\2020\2012\201216\EB3453-2-P1A1.lcd

Intensity

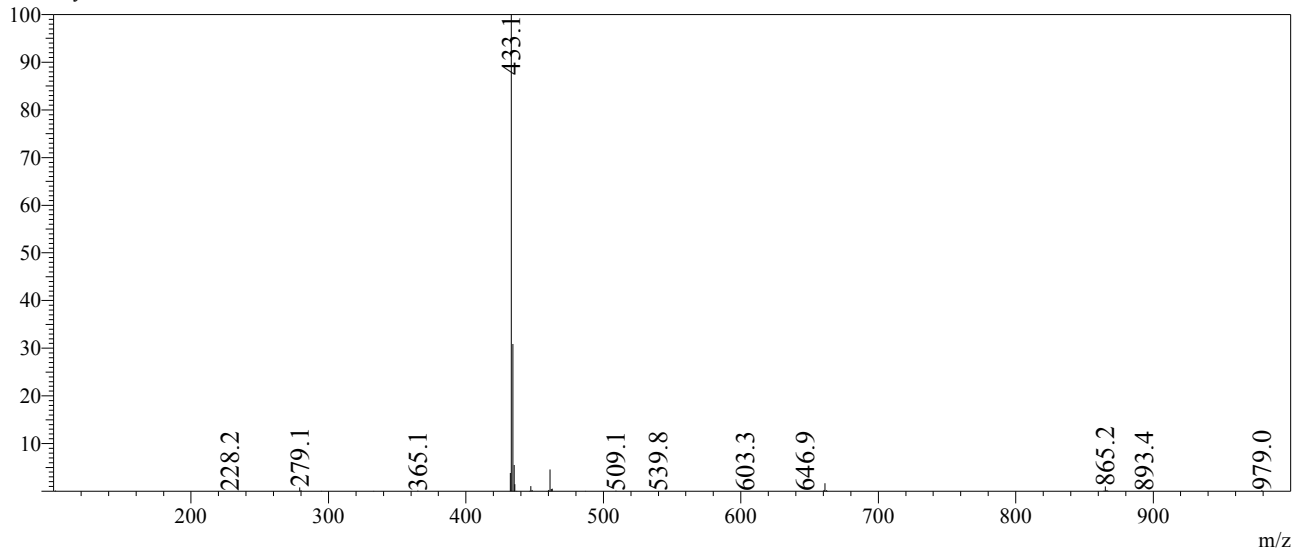

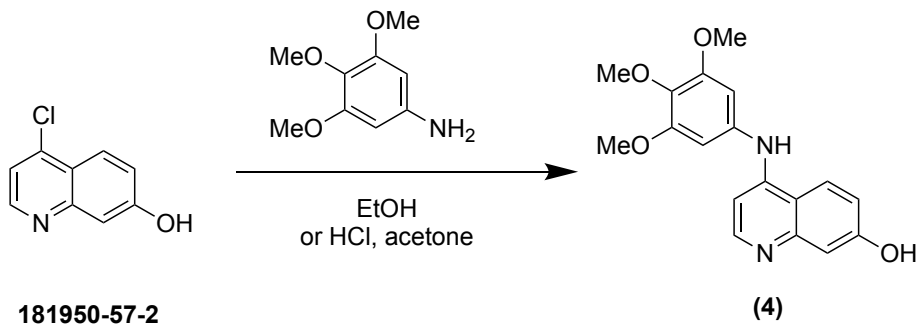

HCl (12.0 M, 1.00 mL, 4.31 eq) was added to a solution of 4-chloroquinolin-7-ol (500 mg, 2.78 mmol, 1.00 eq) and 3,4,5-trimethoxyaniline (2.04 g, 11.1 mmol, 4.00 eq) in acetone (30.0 mL). The mixture was stirred at 75 °C for 16 h. LC-MS (EB3453-3-P1L2) clearly showed the desired MS peak. The reaction was cooled to room temperature, poured into ice water, and sodium hydroxide solution was added to adjust pH to 9 (2 M NaOH). The sample was then extracted with ethyl acetate (100 mL\*3). The organic phase was dried over Na<sub>2</sub>SO<sub>4</sub>, filtered and concentrated to dryness under reduced pressure. The residue was purified by flash silica gel chromatography (ISCO®; 12.0 g Sepa Flash® Silica Flash Column, Eluent of 0~75% Ethyl acetate/Petroleum ether gradient @ 45 mL/min) to afford Compound **4** (700 mg, 2.12 mmol, 76.3% yield) as a light yellow solid. LCMS (EB3453-3-P1C1) and NMR (EB3453-3-P1N2)

**<sup>1</sup>H NMR:** (400 MHz, MeOD)

δ: 8.00-8.07 (m, 2H), 6.95-7.02 (m, 1H), 6.80-6.85 (m, 1H), 6.63-6.69 (m, 2H), 6.56-6.62 (m, 1H), 3.81 (s, 6H), 3.76 (s, 3H).

# LCMS REPORT

Print time : 12/16/2020 11:08:38  
Compound ID : 1  
Sample ID : EB3453-3-P1L2  
Injection Date : 12/16/2020 11:06:54 AM  
Injection Vol : 3ul  
Location : tray1 vail66  
Acq Method : 5-95AB 1.5min 220&254 Shimadzu All.lcm  
Org DataFile : D:\DATA\2020\2012\201216\EB3453-3-P1L2.lcd  
Instrument & column: LCMS-SAW 1-2402  
Chromolith Flash RP-18, 5um,3.0\*25mm

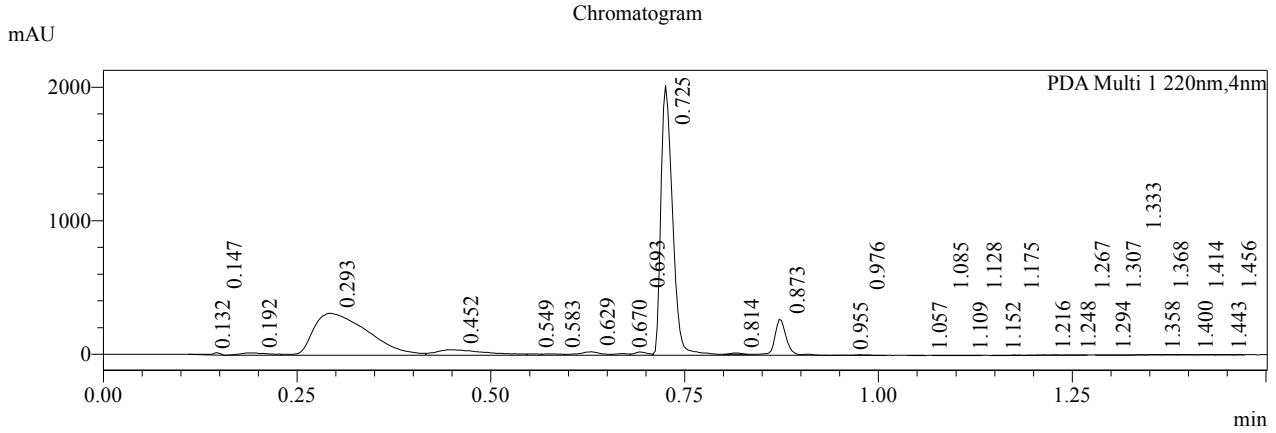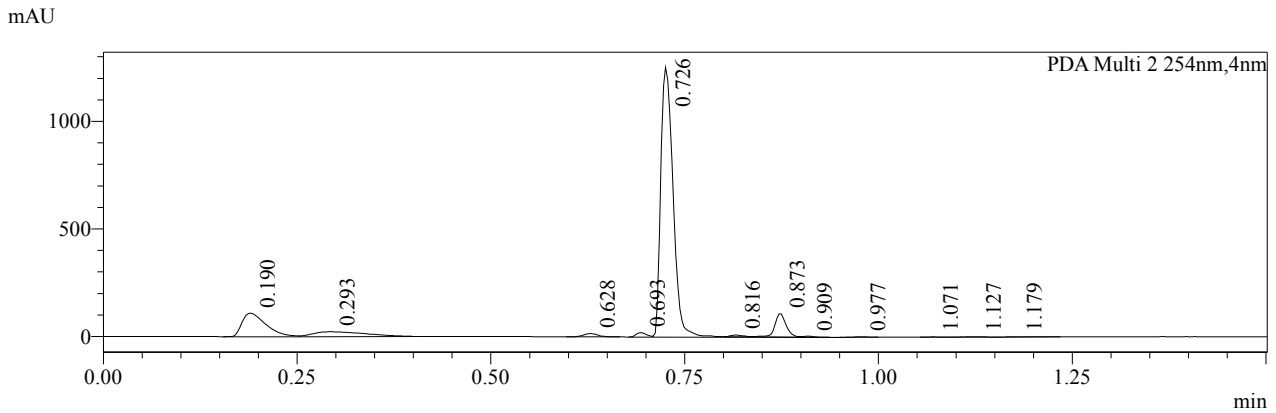

- 1 PDA Multi 1 / 220nm,4nm
- 2 PDA Multi 2 / 254nm,4nm

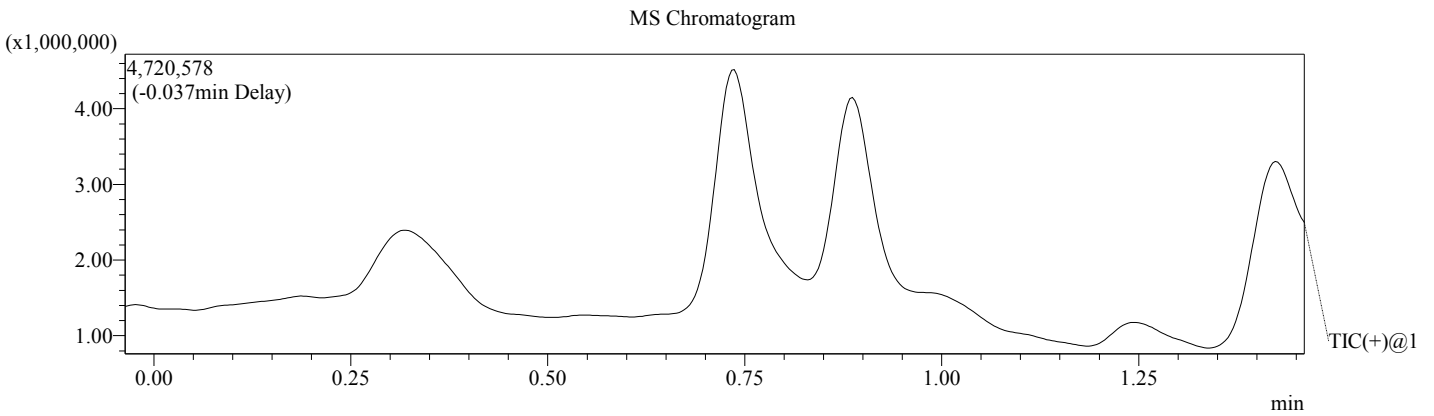

## Integration Result

## PDA Ch1 220nm

| Peak# | Ret. Time | Height  | Height% | USP Width | Area    | Area%  |
|-------|-----------|---------|---------|-----------|---------|--------|
| 1     | 0.132     | 4390    | 0.155   | 0.000     | 3537    | 0.081  |
| 2     | 0.147     | 18092   | 0.639   | 0.022     | 12277   | 0.279  |
| 3     | 0.192     | 18235   | 0.644   | 0.099     | 49592   | 1.129  |
| 4     | 0.293     | 314814  | 11.113  | 0.132     | 1534325 | 34.920 |
| 5     | 0.452     | 42097   | 1.486   | 0.123     | 190695  | 4.340  |
| 6     | 0.549     | 10705   | 0.378   | 0.089     | 11229   | 0.256  |
| 7     | 0.583     | 10190   | 0.360   | 0.144     | 16943   | 0.386  |
| 8     | 0.629     | 26464   | 0.934   | 0.060     | 55177   | 1.256  |
| 9     | 0.670     | 12587   | 0.444   | 0.085     | 15670   | 0.357  |
| 10    | 0.693     | 25814   | 0.911   | 0.041     | 30335   | 0.690  |
| 11    | 0.725     | 2020450 | 71.321  | 0.032     | 2127222 | 48.414 |
| 12    | 0.814     | 10439   | 0.369   | 0.031     | 10374   | 0.236  |
| 13    | 0.873     | 268760  | 9.487   | 0.030     | 285959  | 6.508  |
| 14    | 0.955     | 1786    | 0.063   | 0.028     | 1488    | 0.034  |
| 15    | 0.976     | 5162    | 0.182   | 0.044     | 6805    | 0.155  |
| 16    | 1.057     | 1415    | 0.050   | 0.056     | 1052    | 0.024  |
| 17    | 1.085     | 2379    | 0.084   | 0.027     | 2045    | 0.047  |
| 18    | 1.109     | 1829    | 0.065   | 0.041     | 2032    | 0.046  |
| 19    | 1.128     | 1971    | 0.070   | 0.027     | 1754    | 0.040  |
| 20    | 1.152     | 2282    | 0.081   | 0.008     | 1992    | 0.045  |
| 21    | 1.175     | 2522    | 0.089   | 0.069     | 4524    | 0.103  |
| 22    | 1.216     | 2756    | 0.097   | 0.024     | 2703    | 0.062  |
| 23    | 1.248     | 3066    | 0.108   | 0.046     | 3046    | 0.069  |
| 24    | 1.267     | 2830    | 0.100   | 0.026     | 1833    | 0.042  |
| 25    | 1.294     | 2883    | 0.102   | 0.041     | 2881    | 0.066  |
| 26    | 1.307     | 2590    | 0.091   | 0.027     | 2980    | 0.068  |
| 27    | 1.333     | 2528    | 0.089   | 0.022     | 1438    | 0.033  |
| 28    | 1.358     | 2485    | 0.088   | 0.083     | 3731    | 0.085  |
| 29    | 1.368     | 2719    | 0.096   | 0.058     | 2884    | 0.066  |
| 30    | 1.400     | 2554    | 0.090   | 0.032     | 2243    | 0.051  |
| 31    | 1.414     | 2456    | 0.087   | 0.028     | 2027    | 0.046  |
| 32    | 1.443     | 2053    | 0.072   | 0.039     | 1976    | 0.045  |
| 33    | 1.456     | 1612    | 0.057   | 0.008     | 1084    | 0.025  |

## PDA Ch2 254nm

| Peak# | Ret. Time | Height  | Height% | USP Width | Area    | Area%  |
|-------|-----------|---------|---------|-----------|---------|--------|
| 1     | 0.190     | 110033  | 7.101   | 0.060     | 238411  | 12.499 |
| 2     | 0.293     | 22440   | 1.448   | 0.131     | 105033  | 5.506  |
| 3     | 0.628     | 15795   | 1.019   | 0.039     | 20575   | 1.079  |
| 4     | 0.693     | 20720   | 1.337   | 0.029     | 18938   | 0.993  |
| 5     | 0.726     | 1253347 | 80.886  | 0.033     | 1394772 | 73.122 |
| 6     | 0.816     | 8005    | 0.517   | 0.034     | 8763    | 0.459  |
| 7     | 0.873     | 108827  | 7.023   | 0.029     | 108944  | 5.712  |
| 8     | 0.909     | 4836    | 0.312   | 0.035     | 4843    | 0.254  |
| 9     | 0.977     | 2442    | 0.158   | 0.032     | 2612    | 0.137  |
| 10    | 1.071     | 1100    | 0.071   | 0.035     | 1364    | 0.071  |
| 11    | 1.127     | 1348    | 0.087   | 0.049     | 2160    | 0.113  |
| 12    | 1.179     | 637     | 0.041   | 0.031     | 1040    | 0.055  |

Operator: \_\_\_\_\_

Date: \_\_\_\_\_

Mass Spectrum

RefTime: 0.293 Datafile: D:\DATA\2020\2012\201216\EB3453-3-P1L2.lcd

Intensity

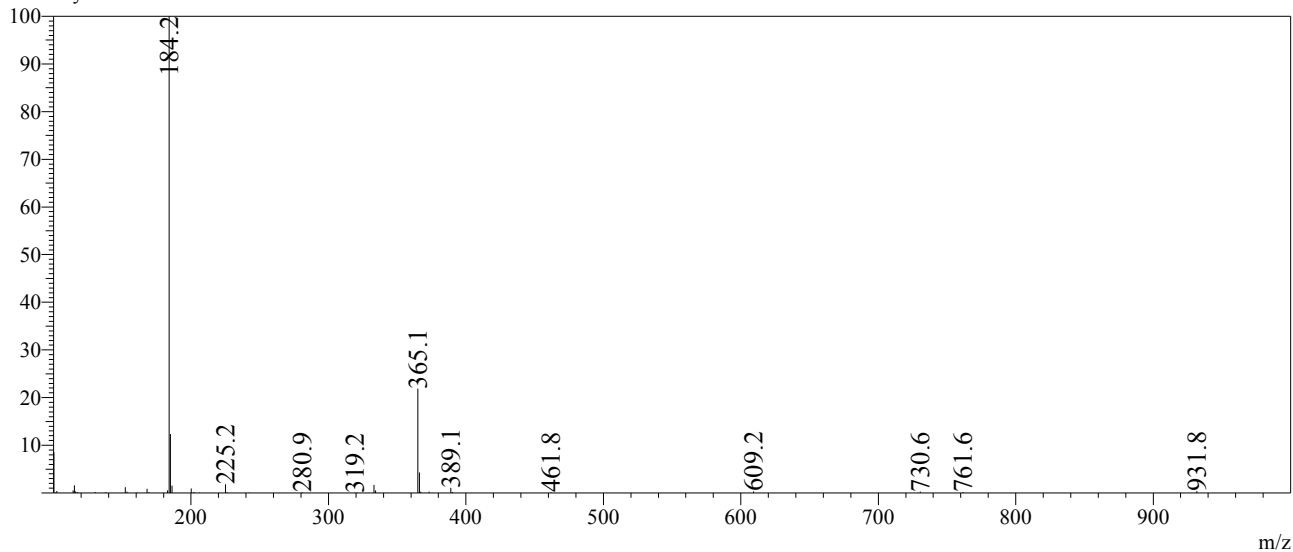

RefTime: 0.453 Datafile: D:\DATA\2020\2012\201216\EB3453-3-P1L2.lcd

Intensity

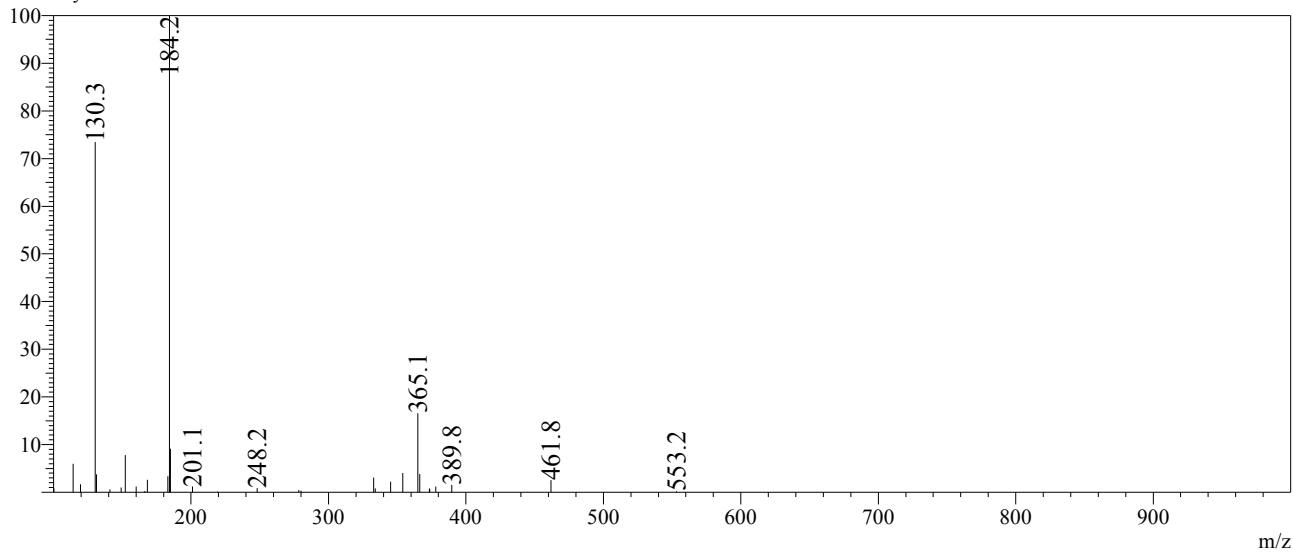

RefTime: 0.727 Datafile: D:\DATA\2020\2012\201216\EB3453-3-P1L2.lcd

Intensity

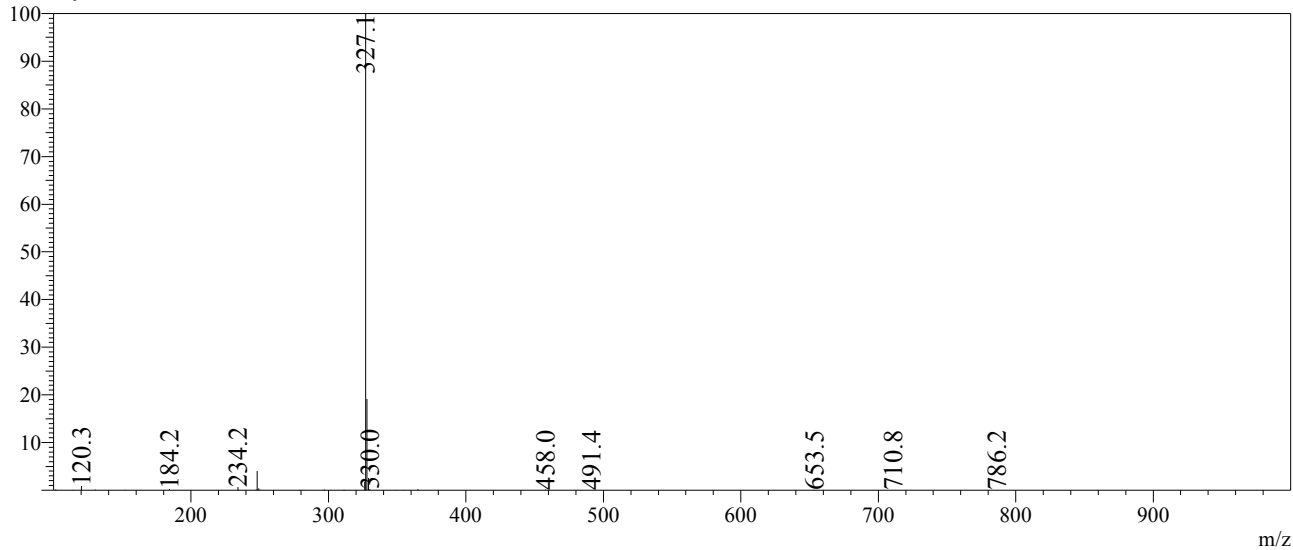

# LCMS REPORT

Print time : 12/17/2020 15:44:29  
Compound ID : 1  
Sample ID : EB3453-3-P1C1  
Injection Date : 12/17/2020 3:42:45 PM  
Injection Vol : 2ul  
Location : tray1 vail71  
Acq Method : 5-95AB 1.5min 220&254 Shimadzu All.lcm  
Org DataFile : D:\DATA\2020\2012\201217\EB3453-3-P1C1.lcd  
Instrument & column: LCMS-SAW 1-2402  
Chromolith Flash RP-18, 5um,3.0\*25mm

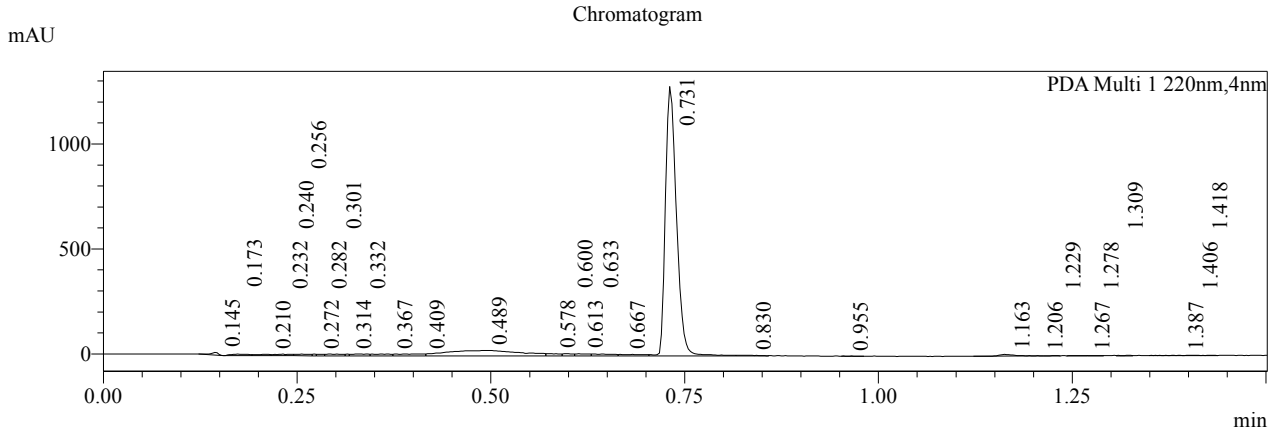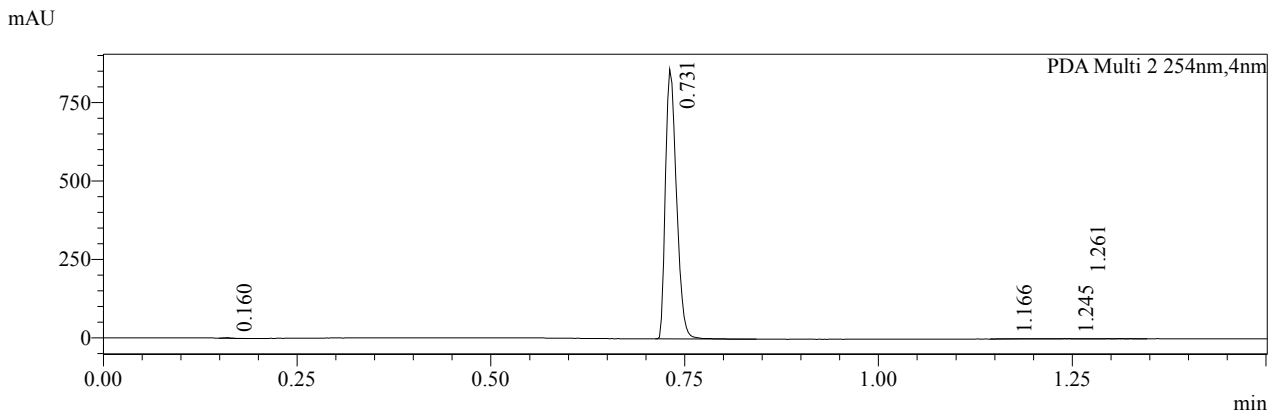

- 1 PDA Multi 1 / 220nm,4nm
- 2 PDA Multi 2 / 254nm,4nm

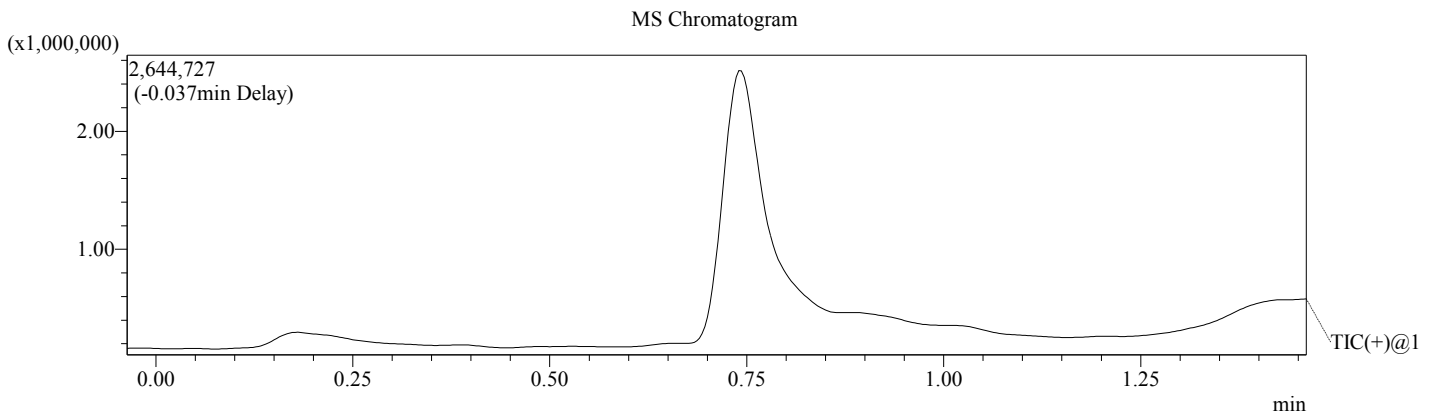

Integration Result

## PDA Ch1 220nm

| Peak# | Ret. Time | Height  | Height% | USP Width | Area    | Area%  |
|-------|-----------|---------|---------|-----------|---------|--------|
| 1     | 0.145     | 13135   | 0.883   | 0.019     | 9047    | 0.545  |
| 2     | 0.173     | 7732    | 0.520   | 0.075     | 12706   | 0.766  |
| 3     | 0.210     | 6549    | 0.440   | 0.151     | 8533    | 0.514  |
| 4     | 0.232     | 7782    | 0.523   | 0.243     | 7183    | 0.433  |
| 5     | 0.240     | 7102    | 0.478   | 0.225     | 4255    | 0.257  |
| 6     | 0.256     | 7817    | 0.526   | 0.119     | 10034   | 0.605  |
| 7     | 0.272     | 7844    | 0.527   | 0.033     | 2332    | 0.141  |
| 8     | 0.282     | 7580    | 0.510   | 0.053     | 4584    | 0.276  |
| 9     | 0.301     | 7879    | 0.530   | 0.000     | 11781   | 0.710  |
| 10    | 0.314     | 7763    | 0.522   | 0.086     | 2363    | 0.142  |
| 11    | 0.332     | 8121    | 0.546   | 0.085     | 12208   | 0.736  |
| 12    | 0.367     | 7902    | 0.531   | 2.083     | 13305   | 0.802  |
| 13    | 0.409     | 8749    | 0.588   | 0.000     | 20807   | 1.254  |
| 14    | 0.489     | 25819   | 1.736   | 0.206     | 168987  | 10.187 |
| 15    | 0.578     | 10221   | 0.687   | 0.334     | 12394   | 0.747  |
| 16    | 0.600     | 10407   | 0.700   | 0.108     | 9123    | 0.550  |
| 17    | 0.613     | 9532    | 0.641   | 0.187     | 11293   | 0.681  |
| 18    | 0.633     | 8814    | 0.593   | 0.123     | 15659   | 0.944  |
| 19    | 0.667     | 6903    | 0.464   | 0.114     | 14097   | 0.850  |
| 20    | 0.731     | 1283040 | 86.274  | 0.031     | 1277414 | 77.009 |
| 21    | 0.830     | 2858    | 0.192   | 0.070     | 4998    | 0.301  |
| 22    | 0.955     | 2110    | 0.142   | 0.034     | 1449    | 0.087  |
| 23    | 1.163     | 7875    | 0.529   | 0.038     | 10604   | 0.639  |
| 24    | 1.206     | 1525    | 0.103   | 0.016     | 1158    | 0.070  |
| 25    | 1.229     | 1657    | 0.111   | 0.029     | 1473    | 0.089  |
| 26    | 1.267     | 1911    | 0.129   | 0.017     | 2164    | 0.130  |
| 27    | 1.278     | 1798    | 0.121   | 0.052     | 1834    | 0.111  |
| 28    | 1.309     | 1972    | 0.133   | 0.016     | 1928    | 0.116  |
| 29    | 1.387     | 1924    | 0.129   | 0.012     | 2642    | 0.159  |
| 30    | 1.406     | 1728    | 0.116   | 0.088     | 1387    | 0.084  |
| 31    | 1.418     | 1124    | 0.076   | 0.016     | 1050    | 0.063  |

## PDA Ch2 254nm

| Peak# | Ret. Time | Height | Height% | USP Width | Area   | Area%  |
|-------|-----------|--------|---------|-----------|--------|--------|
| 1     | 0.160     | 2281   | 0.264   | 0.023     | 1485   | 0.172  |
| 2     | 0.731     | 859783 | 99.461  | 0.031     | 857604 | 99.169 |
| 3     | 1.166     | 877    | 0.101   | 0.034     | 1337   | 0.155  |
| 4     | 1.245     | 837    | 0.097   | 0.081     | 2358   | 0.273  |
| 5     | 1.261     | 665    | 0.077   | 0.045     | 2002   | 0.232  |

Operator: \_\_\_\_\_

Date: \_\_\_\_\_



Mass Spectrum

RefTime: 0.490 Datafile: D:\DATA\2020\2012\201217\EB3453-3-P1C1.lcd

Intensity

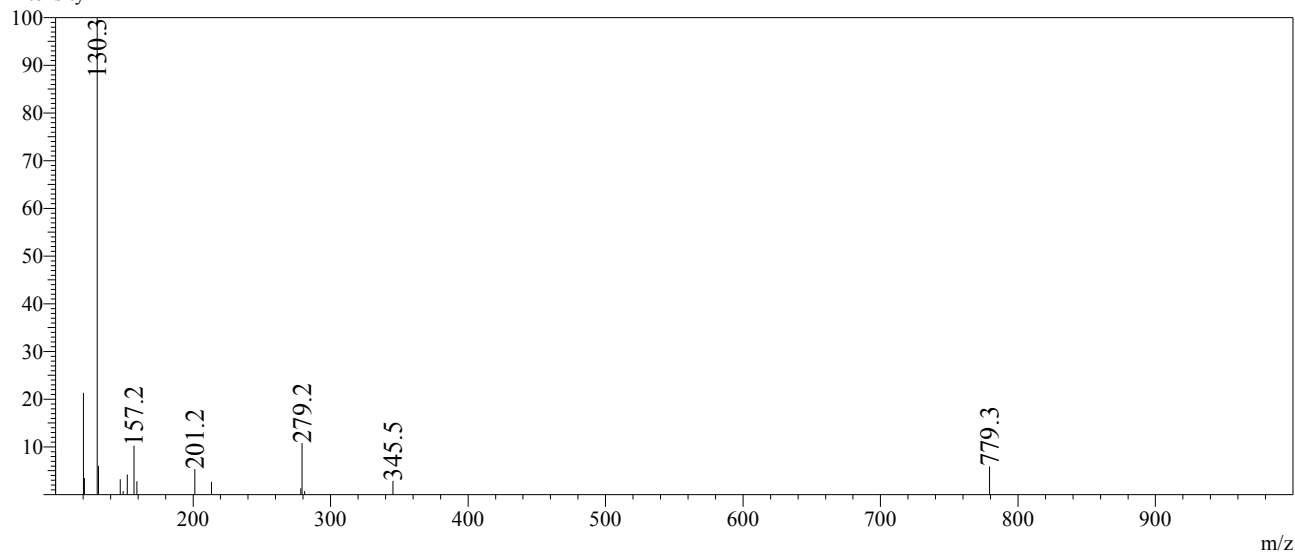

RefTime: 0.730 Datafile: D:\DATA\2020\2012\201217\EB3453-3-P1C1.lcd

Intensity

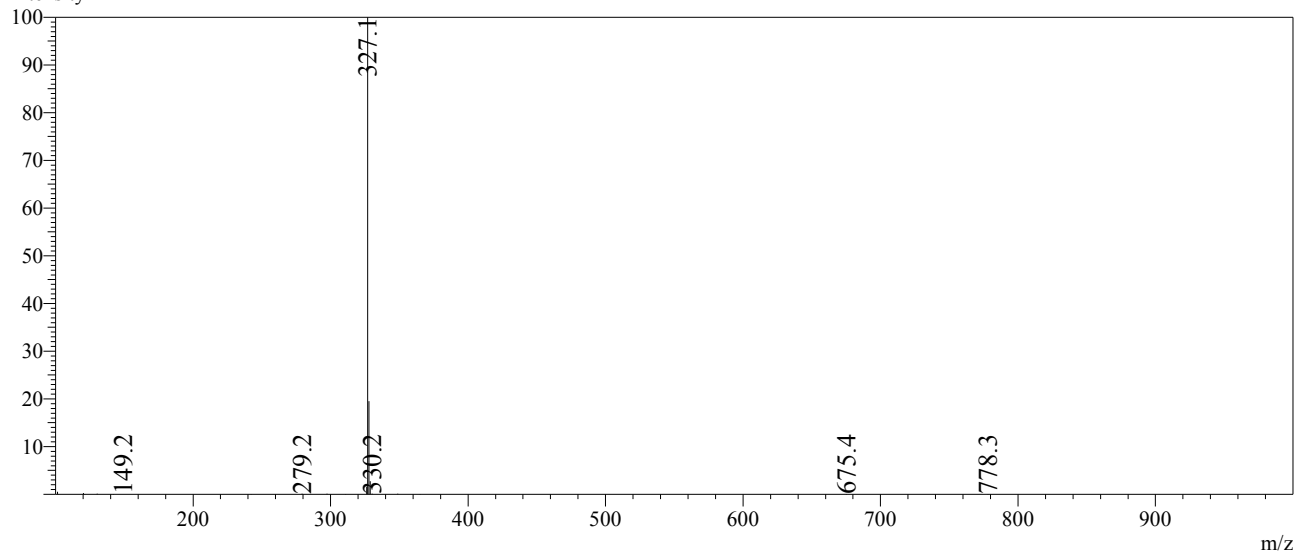

Compound ID:

EB3453-3-P1N2 MeOD Bruker\_NT-B\_400MHZ

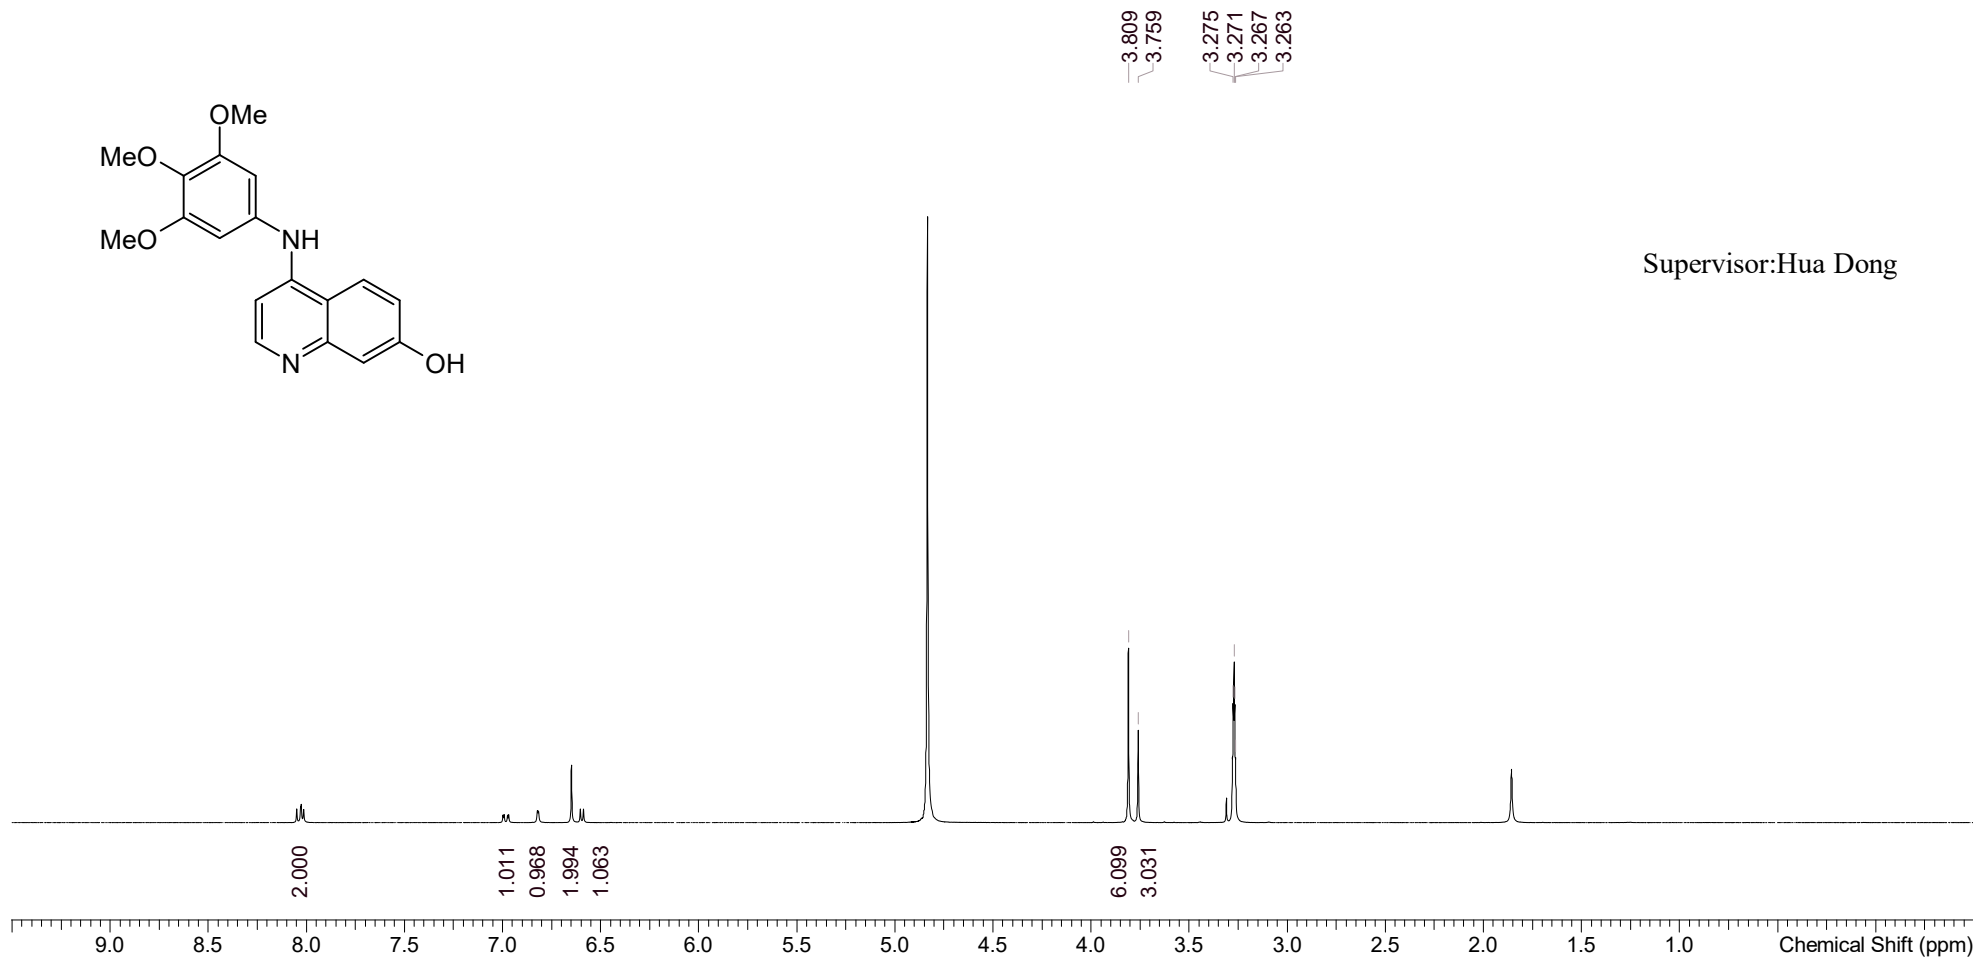

Operator:

Date:

If you have any question related to this spectrum, please contact [Dong\\_Hua@wuxiapptec.com](mailto:Dong_Hua@wuxiapptec.com) for support.

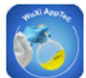

**WuXi V-Lab**

Request organic compound synthesis through a mobile device with ease, speed and flexibility.

Please click below link to download the APP: <http://www.wuxiapptec.com/WXVLab>

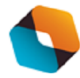

**LabNetwork**

Off-the-shelf compounds available in an easy to use, structure searchable catalog! Millions of discovery products from hundreds of suppliers, including > 125,000 WuXi novel catalog products for medicinal chemistry & drug discovery. Online at [www.LabNetwork.com](http://www.LabNetwork.com)

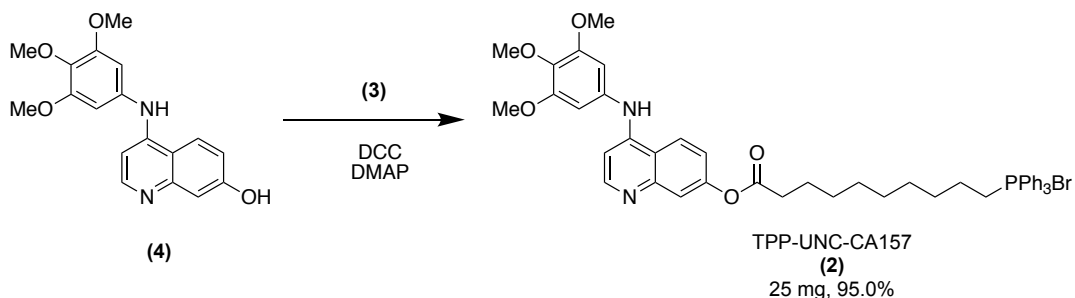

A mixture of compound **(4)** (200 mg, 613  $\mu\text{mol}$ , 1.00 eq), compound **(3)** (315 mg, 613  $\mu\text{mol}$ , 1.00 eq), DMAP (3.74 mg, 30.6  $\mu\text{mol}$ , 0.05 eq) and N,N'-dicyclohexylmethanediimine (126 mg, 613  $\mu\text{mol}$ , 124  $\mu\text{L}$ , 1.00 eq) in  $\text{CH}_2\text{Cl}_2$  (10 mL) was stirred at 20  $^\circ\text{C}$  for 24 h under  $\text{N}_2$  atmosphere. LC-MS showed that the desired compound was detected (EB3453-5-P1L1). The mixture was concentrated under reduced pressure to afford crude. The crude was purified by chromatography column ( $\text{SiO}_2$ , EtOAc/Methanol = 20:1~5:1), and then prep-HPLC (column: Phenomenex Luna 30\*30mm\*10 $\mu\text{m}$ +YMC AQ 100\*30\*10 $\mu\text{m}$ ; mobile phase: [water (0.1%TFA)-ACN]; B%: 15%-65%, 26 min) to afford TPP-UNC-CA157 **(2)** (150 mg, 157  $\mu\text{mol}$ , 25.6% yield) as a yellow oil.

**$^1\text{H}$  NMR:** (400 MHz,  $\text{CDCl}_3$ ) (EB3453-6-P1N1)

$\delta$ : 11.27 (s, 1H), 8.96 (d,  $J = 9.26$  Hz, 1H), 8.19 (d,  $J = 4.75$  Hz, 1 H), 7.77-7.86 (m, 4 H), 7.57-7.74 (m, 12H), 7.27-7.34 (m, 1H), 6.81 (d,  $J = 6.50$  Hz, 1H), 6.68 (s, 2H), 3.87 (s, 3H), 3.82 (s, 5H), 3.13 - 3.30 (m, 2H), 2.54 (t,  $J = 6.82$  Hz, 2H), 1.68 (m, 4H), 1.55 (d,  $J = 6.00$  Hz, 2H), 1.19-1.45 (m, 10H).

**$^{13}\text{C}$  NMR** ( $\text{CDCl}_3$ ) (ET58533-153-P1C2)

$\delta$ : 171.6, 155.6, 153.9, 142.9, 140.1, 136.9, 135.3, 133.3, 130.6, 126.5, 122.1, 118.3, 117.4, 115.8, 112.4, 102.5, 99.7, 61.0, 56.3, 34.0, 30.2, 30.1, 28.3, 28.0, 24.2, 22.6, 22.4, 22.2

# LCMS REPORT

Print time : 12/29/2020 10:11:55  
Compound ID : 1  
Sample ID : EB3453-5-P1L1  
Injection Date : 12/29/2020 10:10:13 AM  
Injection Vol : 3ul  
Location : tray1 vail48  
Acq Method : 5-95AB 1.5min 220&254 Shimadzu All.lcm  
Org DataFile : D:\DATA\2020\2012\201229\EB3453-5-P1L1.lcd  
Instrument & column: LCMS-SAW 1-2402  
Chromolith Flash RP-18, 5um,3.0\*25mm

Chromatogram

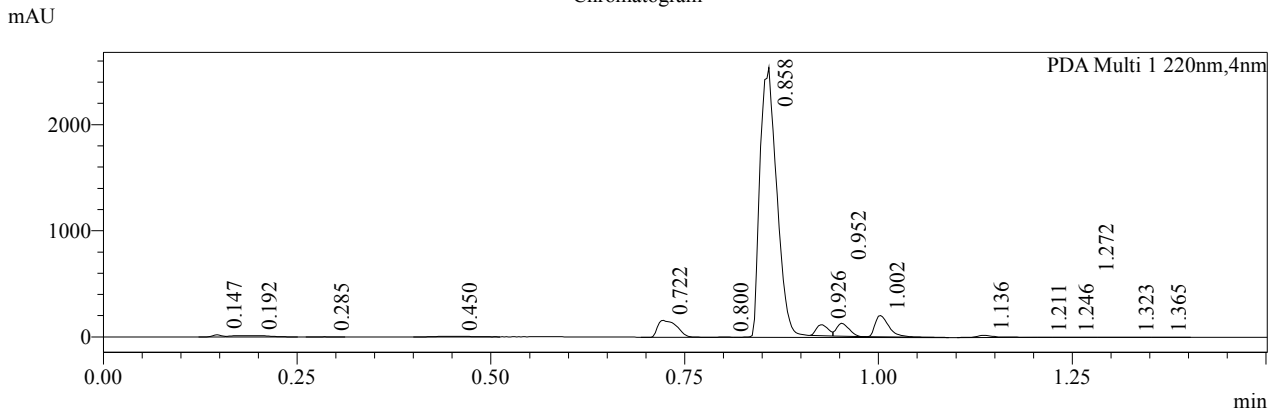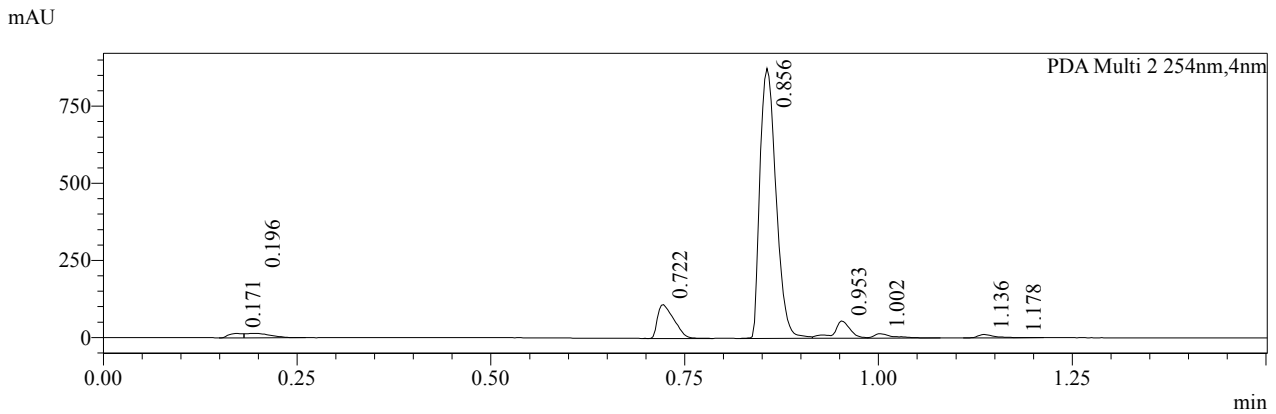

- 1 PDA Multi 1 / 220nm,4nm
- 2 PDA Multi 2 / 254nm,4nm

MS Chromatogram

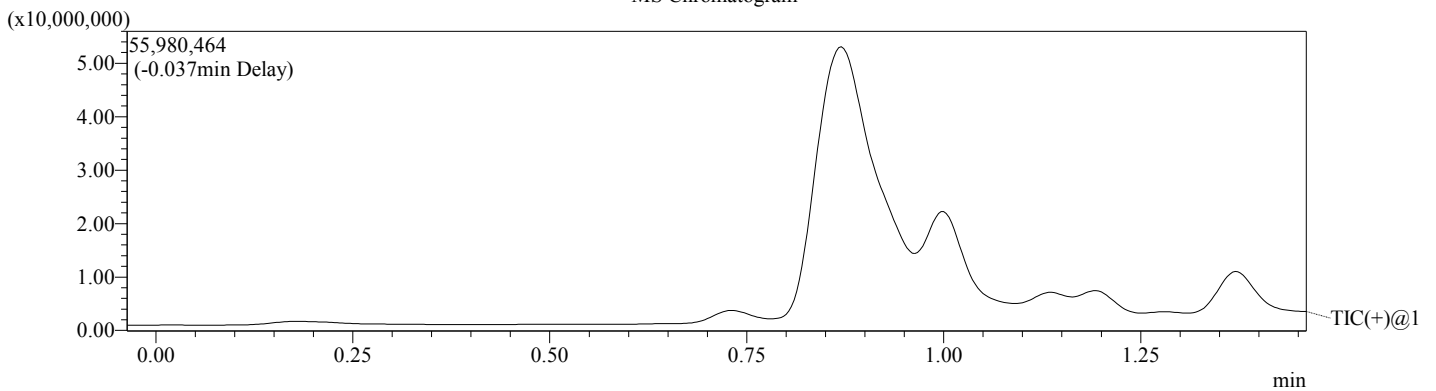

Integration Result

## PDA Ch1 220nm

| Peak# | Ret. Time | Height  | Height% | USP Width | Area    | Area%  |
|-------|-----------|---------|---------|-----------|---------|--------|
| 1     | 0.147     | 20478   | 0.640   | 0.024     | 16165   | 0.335  |
| 2     | 0.192     | 12968   | 0.405   | 0.129     | 42983   | 0.890  |
| 3     | 0.285     | 1076    | 0.034   | 0.034     | 1290    | 0.027  |
| 4     | 0.450     | 6483    | 0.203   | 0.080     | 18895   | 0.391  |
| 5     | 0.722     | 159002  | 4.968   | 0.047     | 273181  | 5.658  |
| 6     | 0.800     | 3216    | 0.100   | 0.034     | 3123    | 0.065  |
| 7     | 0.858     | 2542386 | 79.431  | 0.128     | 3925121 | 81.301 |
| 8     | 0.926     | 104186  | 3.255   | 0.033     | 115002  | 2.382  |
| 9     | 0.952     | 121395  | 3.793   | 0.036     | 134747  | 2.791  |
| 10    | 1.002     | 201813  | 6.305   | 0.037     | 250754  | 5.194  |
| 11    | 1.136     | 21226   | 0.663   | 0.042     | 37486   | 0.776  |
| 12    | 1.211     | 1840    | 0.057   | 0.000     | 1540    | 0.032  |
| 13    | 1.246     | 1334    | 0.042   | 0.064     | 2045    | 0.042  |
| 14    | 1.272     | 1217    | 0.038   | 0.036     | 1063    | 0.022  |
| 15    | 1.323     | 909     | 0.028   | 0.148     | 2722    | 0.056  |
| 16    | 1.365     | 1219    | 0.038   | 0.051     | 1786    | 0.037  |

## PDA Ch2 254nm

| Peak# | Ret. Time | Height | Height% | USP Width | Area    | Area%  |
|-------|-----------|--------|---------|-----------|---------|--------|
| 1     | 0.171     | 14208  | 1.297   | 0.150     | 19134   | 1.199  |
| 2     | 0.196     | 14328  | 1.308   | 0.222     | 31705   | 1.986  |
| 3     | 0.722     | 109485 | 9.996   | 0.045     | 159994  | 10.022 |
| 4     | 0.856     | 875242 | 79.910  | 0.043     | 1265463 | 79.267 |
| 5     | 0.953     | 55954  | 5.109   | 0.037     | 80355   | 5.033  |
| 6     | 1.002     | 14151  | 1.292   | 0.042     | 22712   | 1.423  |
| 7     | 1.136     | 10941  | 0.999   | 0.041     | 15874   | 0.994  |
| 8     | 1.178     | 973    | 0.089   | 0.294     | 1212    | 0.076  |

Operator: \_\_\_\_\_

Date: \_\_\_\_\_

Mass Spectrum

RefTime: 0.723 Datafile: D:\DATA\2020\2012\201229\EB3453-5-PIL1.lcd

Intensity

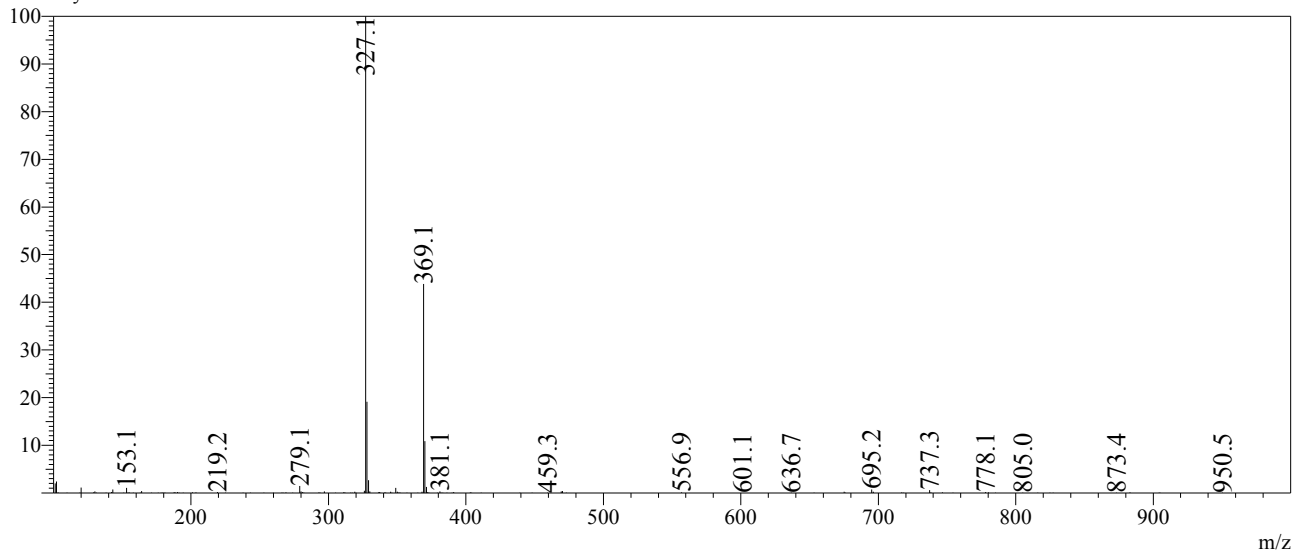

RefTime: 0.857 Datafile: D:\DATA\2020\2012\201229\EB3453-5-PIL1.lcd

Intensity

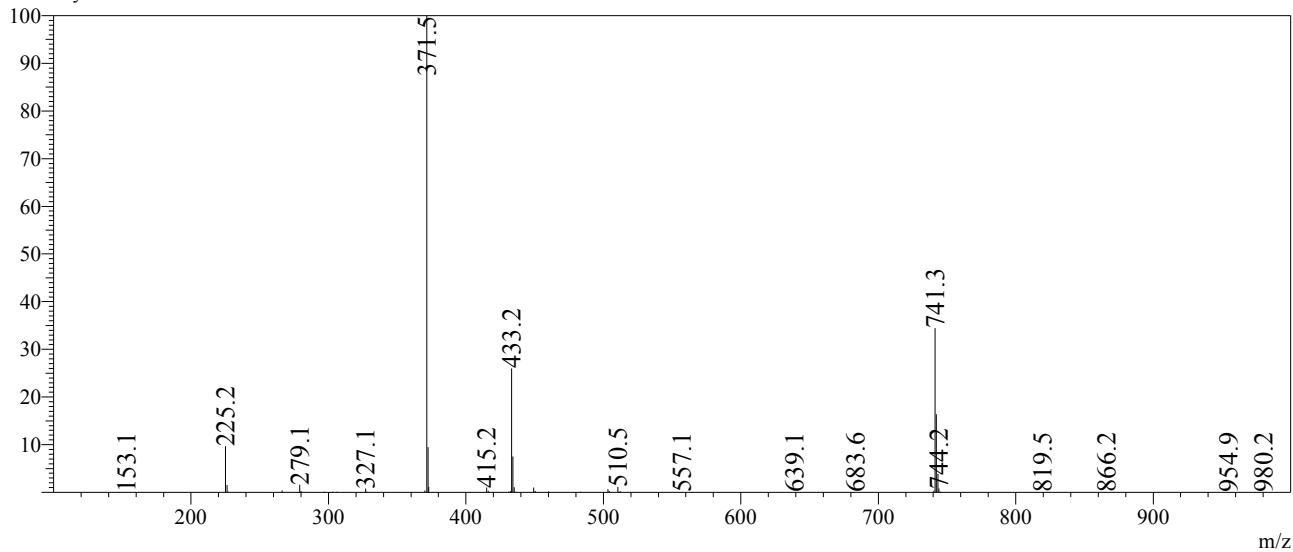

RefTime: 0.927 Datafile: D:\DATA\2020\2012\201229\EB3453-5-PIL1.lcd

Intensity

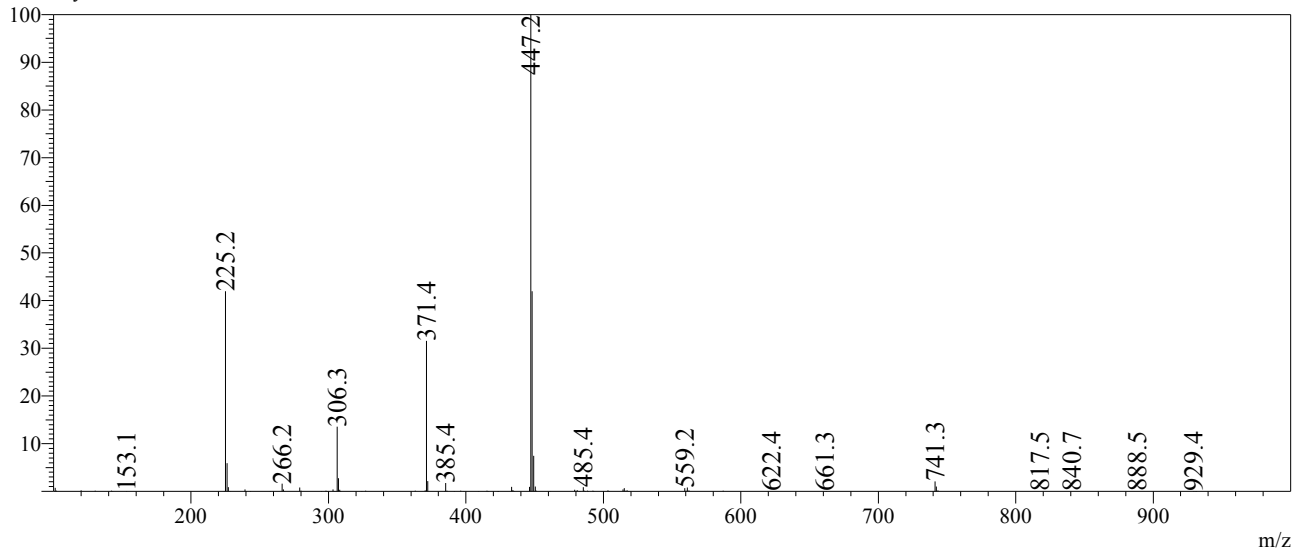

Compound ID: target (3)

EB3453-6-P1N1 CDCl3 Bruker\_NT-B\_400MHZ

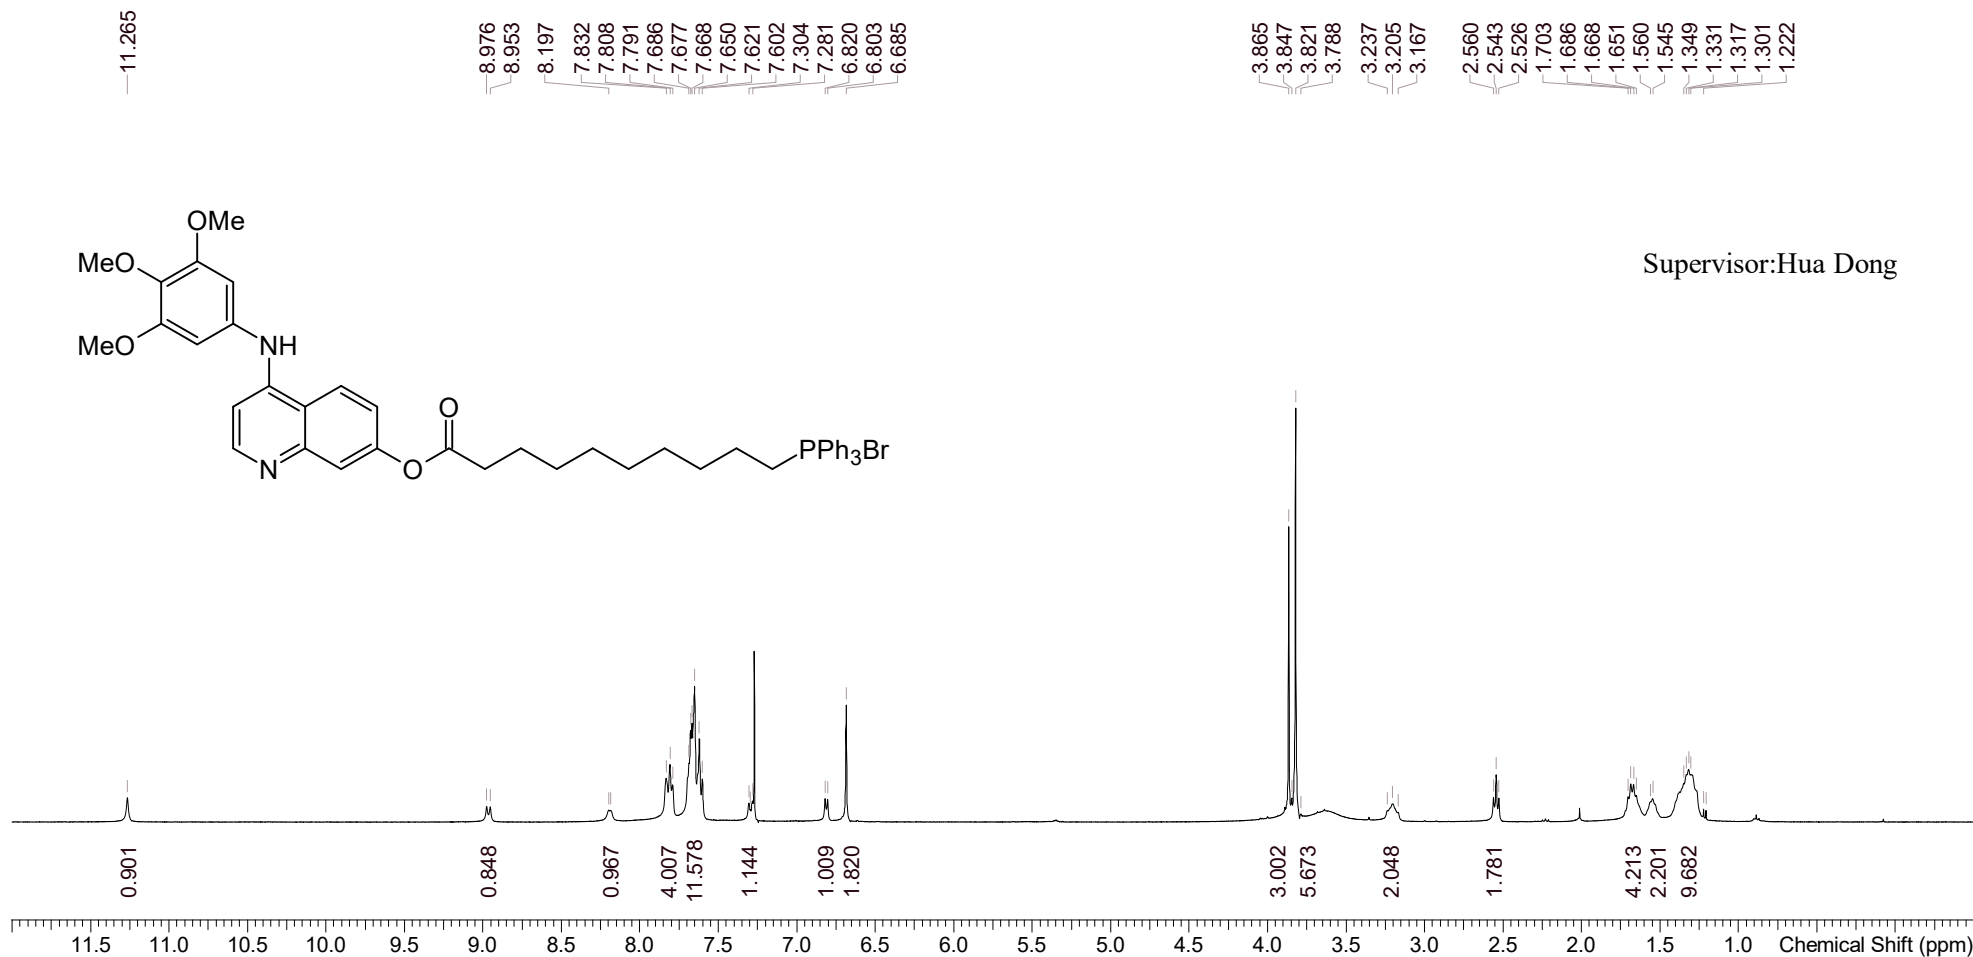

Operator:

Date:

If you have any question related to this spectrum, please contact [Dong\\_Hua@wuxiapptec.com](mailto:Dong_Hua@wuxiapptec.com) for support.



WuXi V-Lab

Request organic compound synthesis through a mobile device with ease, speed and flexibility.

Please click below link to download the APP: <http://www.wuxiapptec.com/WXVLab>

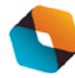

LabNetwork

Off-the-shelf compounds available in an easy to use, structure searchable catalog! Millions of discovery products from hundreds of suppliers, including > 125,000

WuXi novel catalog products for medicinal chemistry & drug discovery. Online at [www.LabNetwork.com](http://www.LabNetwork.com)

LCMS REPORT

```

=====
Print Time       : 1/4/2021      11:25:23
Compound ID     : 1
Sample ID      : EB3453-6-P1A1
Injection Date  : Mon, 4- Jan- 2021    09:52:23
Acq Operator   : Admin
Location       : P2-D-09
Inj. Vol.      : 3.0 u1
Acq Method     : D:\DATA_OPENACCESS\2020\12\193\10-80AB_4min_Lilly_
                Agilent.M
Data Filename   : D:\DATA_OPENACCESS\2020\12\193\EB3453-6-P1A1.D

Instrument      : LCMS_NA Agilent 1290 Infinity II
    
```

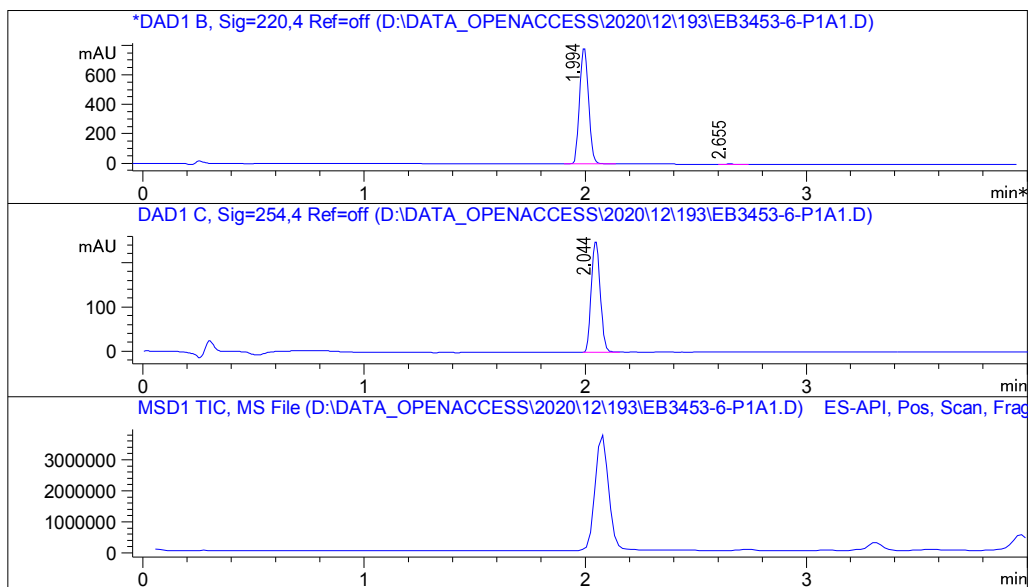

Report

```

=====
Signal 1 : DAD1 B, Sig=220,4 Ref=off
-----
Peak #   RT [min]   Height   Height %   Width [min]   Area   Area %
-----
1       1.994   793.884   99.849     0.045   2245.362  99.810
2       2.655     1.203     0.151     0.053     4.272    0.190
-----
Signal 2 : DAD1 C, Sig=254,4 Ref=off
-----
Peak #   RT [min]   Height   Height %   Width [min]   Area   Area %
-----
1       2.044   253.261  100.000    0.045     712.811  100.000
-----
    
```



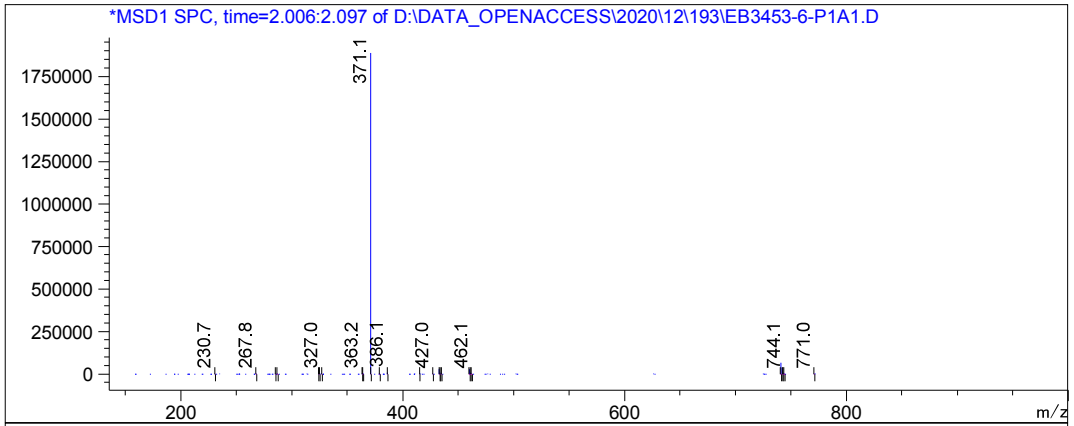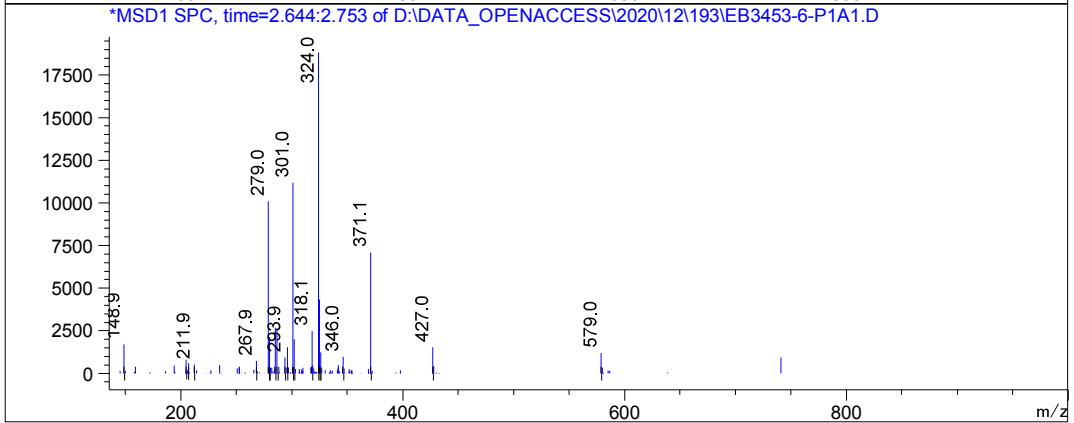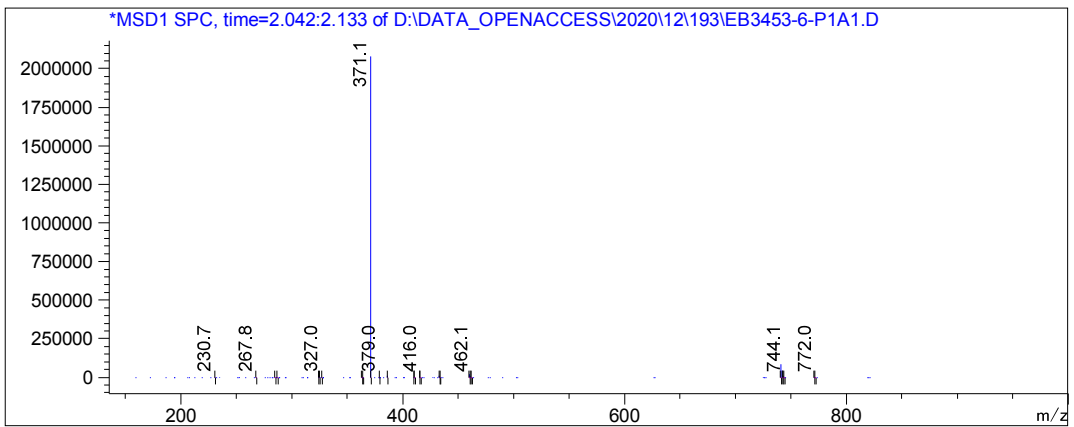

# HPLC REPORT

Print time : 01/04/2021 14:13:00  
 Compound ID : 1  
 Sample ID : EB3453-6-P1F1  
 Injection Date : 2021/1/4 14:04:50  
 Injection Vol : 6ul  
 Location : tray1 vail7  
 Acq Method : 10-80AB\_8min\_220&254.lcm  
 Org Data File : D:\DATA\2021\2101\210104\EB3453-6-P1F1.lcd  
 Instrument & column:HPLC\_01 1-2402  
 XBridge Shield RP18 (2.1x50mm 5µm)

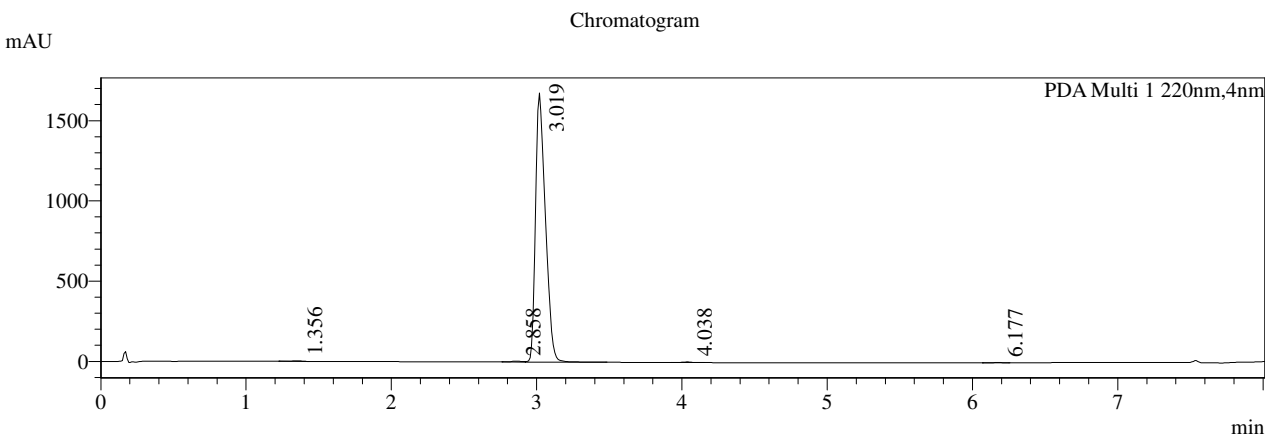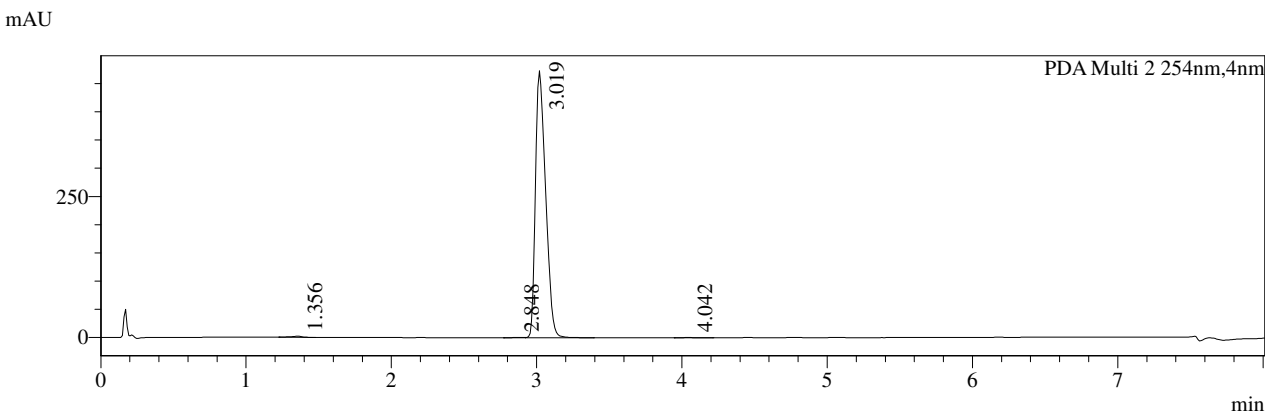

- 1 PDA Multi 1 / 220nm,4nm
- 2 PDA Multi 2 / 254nm,4nm

=====  
 Integration Result  
 =====

Peak Table

PDA Ch1 220nm

| Peak# | Ret. Time | Height  | Height% | USP Width | Area    | Area%  |
|-------|-----------|---------|---------|-----------|---------|--------|
| 1     | 1.356     | 2983    | 0.176   | 0.134     | 13114   | 0.164  |
| 2     | 2.858     | 5821    | 0.344   | 0.162     | 27875   | 0.349  |
| 3     | 3.019     | 1676212 | 99.158  | 0.145     | 7914695 | 99.203 |
| 4     | 4.038     | 3928    | 0.232   | 0.128     | 16380   | 0.205  |
| 5     | 6.177     | 1494    | 0.088   | 0.124     | 6234    | 0.078  |

PDA Ch2 254nm

| Peak# | Ret. Time | Height | Height% | USP Width | Area | Area% |
|-------|-----------|--------|---------|-----------|------|-------|
| 1     | 1.356     | 1995   | 0.419   | 0.134     | 8788 | 0.379 |
| 2     | 2.848     | 477    | 0.100   | 0.290     | 2726 | 0.118 |

| Peak# | Ret. Time | Height | Height% | USP Width | Area    | Area%  |
|-------|-----------|--------|---------|-----------|---------|--------|
| 3     | 3.019     | 472638 | 99.332  | 0.149     | 2300799 | 99.329 |
| 4     | 4.042     | 705    | 0.148   | 0.155     | 4036    | 0.174  |

Operator: \_\_\_\_\_

Date: \_\_\_\_\_

Compound ID: WUCDD-0001031

ET58533-153-P1C2 CDCI3 ZKNJ\_N\_400MHz

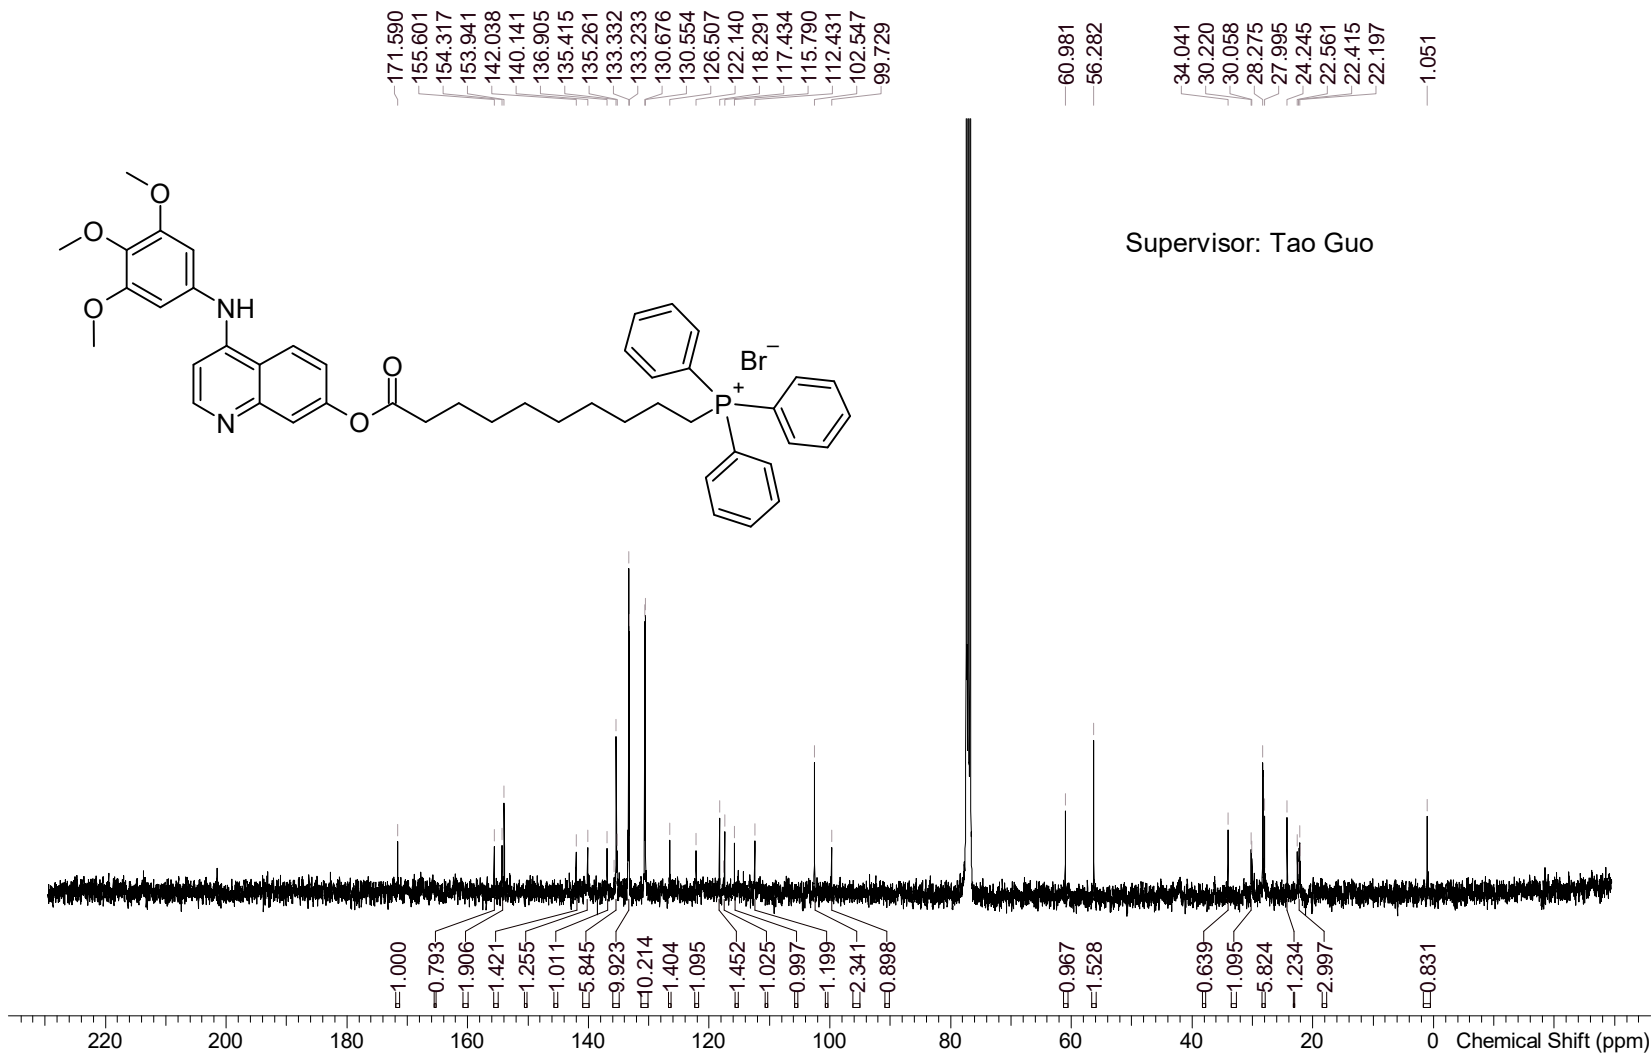

Supervisor: Tao Guo

|                        |                                                    |
|------------------------|----------------------------------------------------|
| Acquisition Time (sec) | 1.0000                                             |
| Comment                | ET58533-1<br>53-P1C2<br>CDCI3<br>ZKNJ_N_<br>400MHz |
| Date                   | 16 Aug<br>2022<br>13:59:57<br>(GMT)                |
| Frequency (MHz)        | 100.5482                                           |
| Nucleus                | 13C                                                |
| Number of Transients   | 3072                                               |
| Origin                 | QUANTU<br>M-I                                      |
| Original Points Count  | 26042                                              |
| Owner                  | admin                                              |
| Points Count           | 65536                                              |
| Pulse Sequence         | s1pulg30                                           |
| Receiver Gain          | 80.00                                              |
| SW(cyclical) (Hz)      | 26041.00                                           |
| Solvent                | CHLORO<br>FORM-d                                   |
| Spectrum Offset (Hz)   | 10054.824<br>2                                     |
| Spectrum Type          | standard                                           |
| Sweep Width (Hz)       | 26040.60                                           |
| Temperature (degree C) | 22.550                                             |

If you have any questions related to this NMR, please contact [IDSU\\_CS@wuxiapptec.com](mailto:IDSU_CS@wuxiapptec.com) for support.

Operator:

Date:
